# Supplementary material
Source: ML conference proceedings conference paper supplement (https://openreview.net/forum?id=RsYG2DAsc1)

CIFAR-10

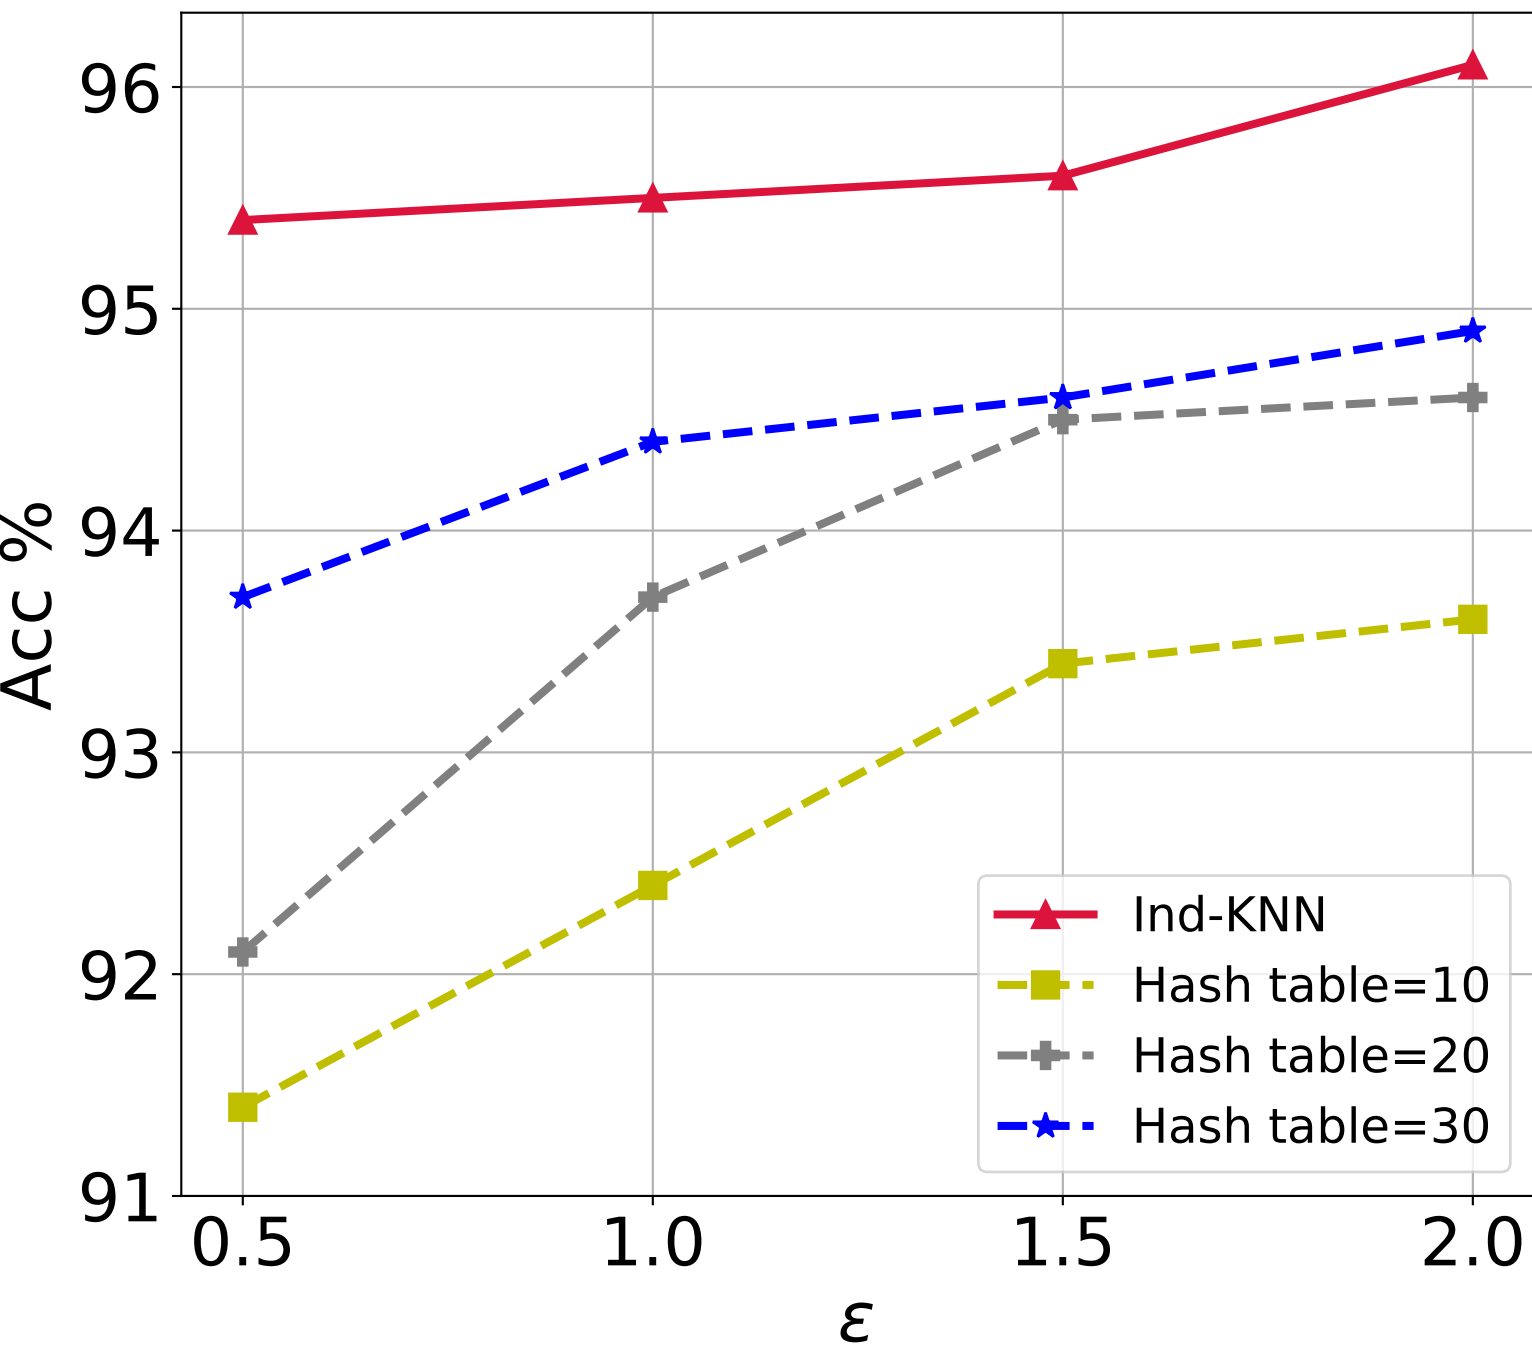

AG News

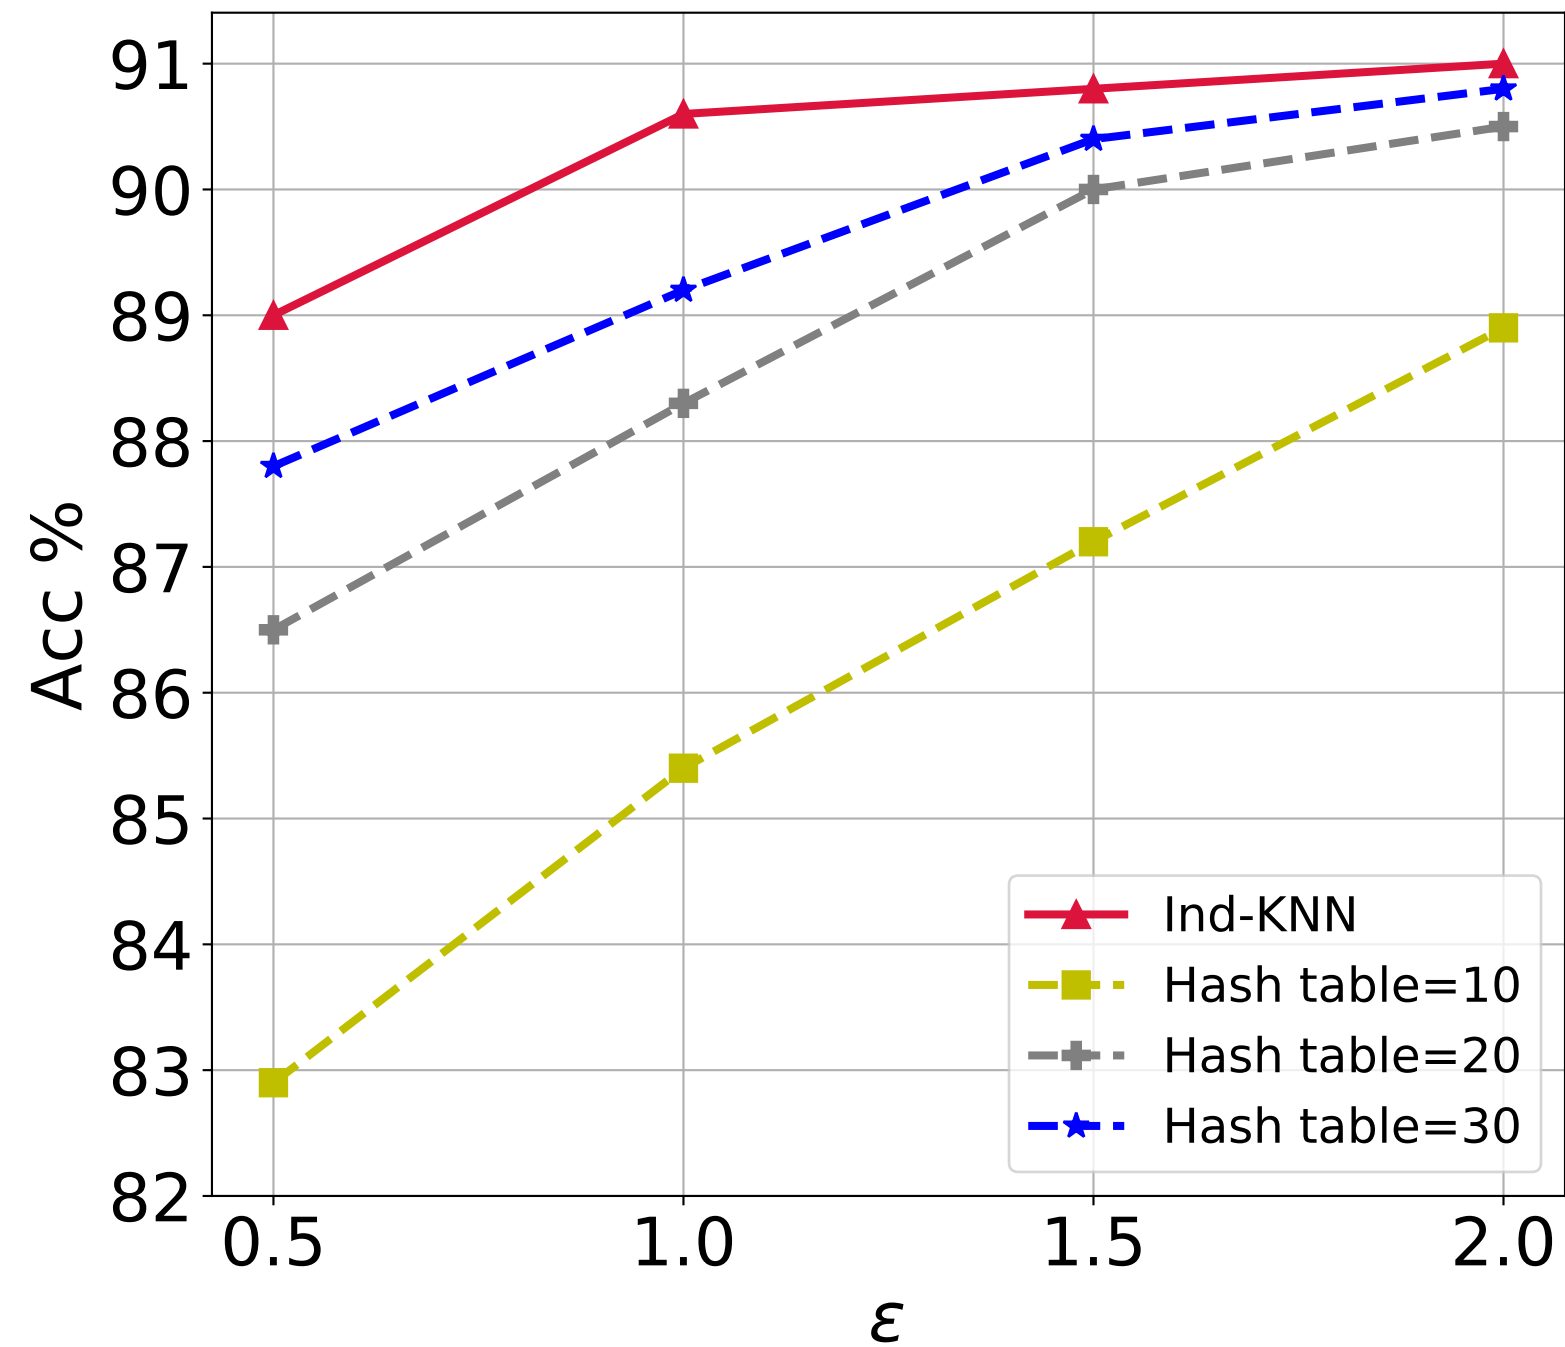

Supplement: supplementary_material [file attachment]

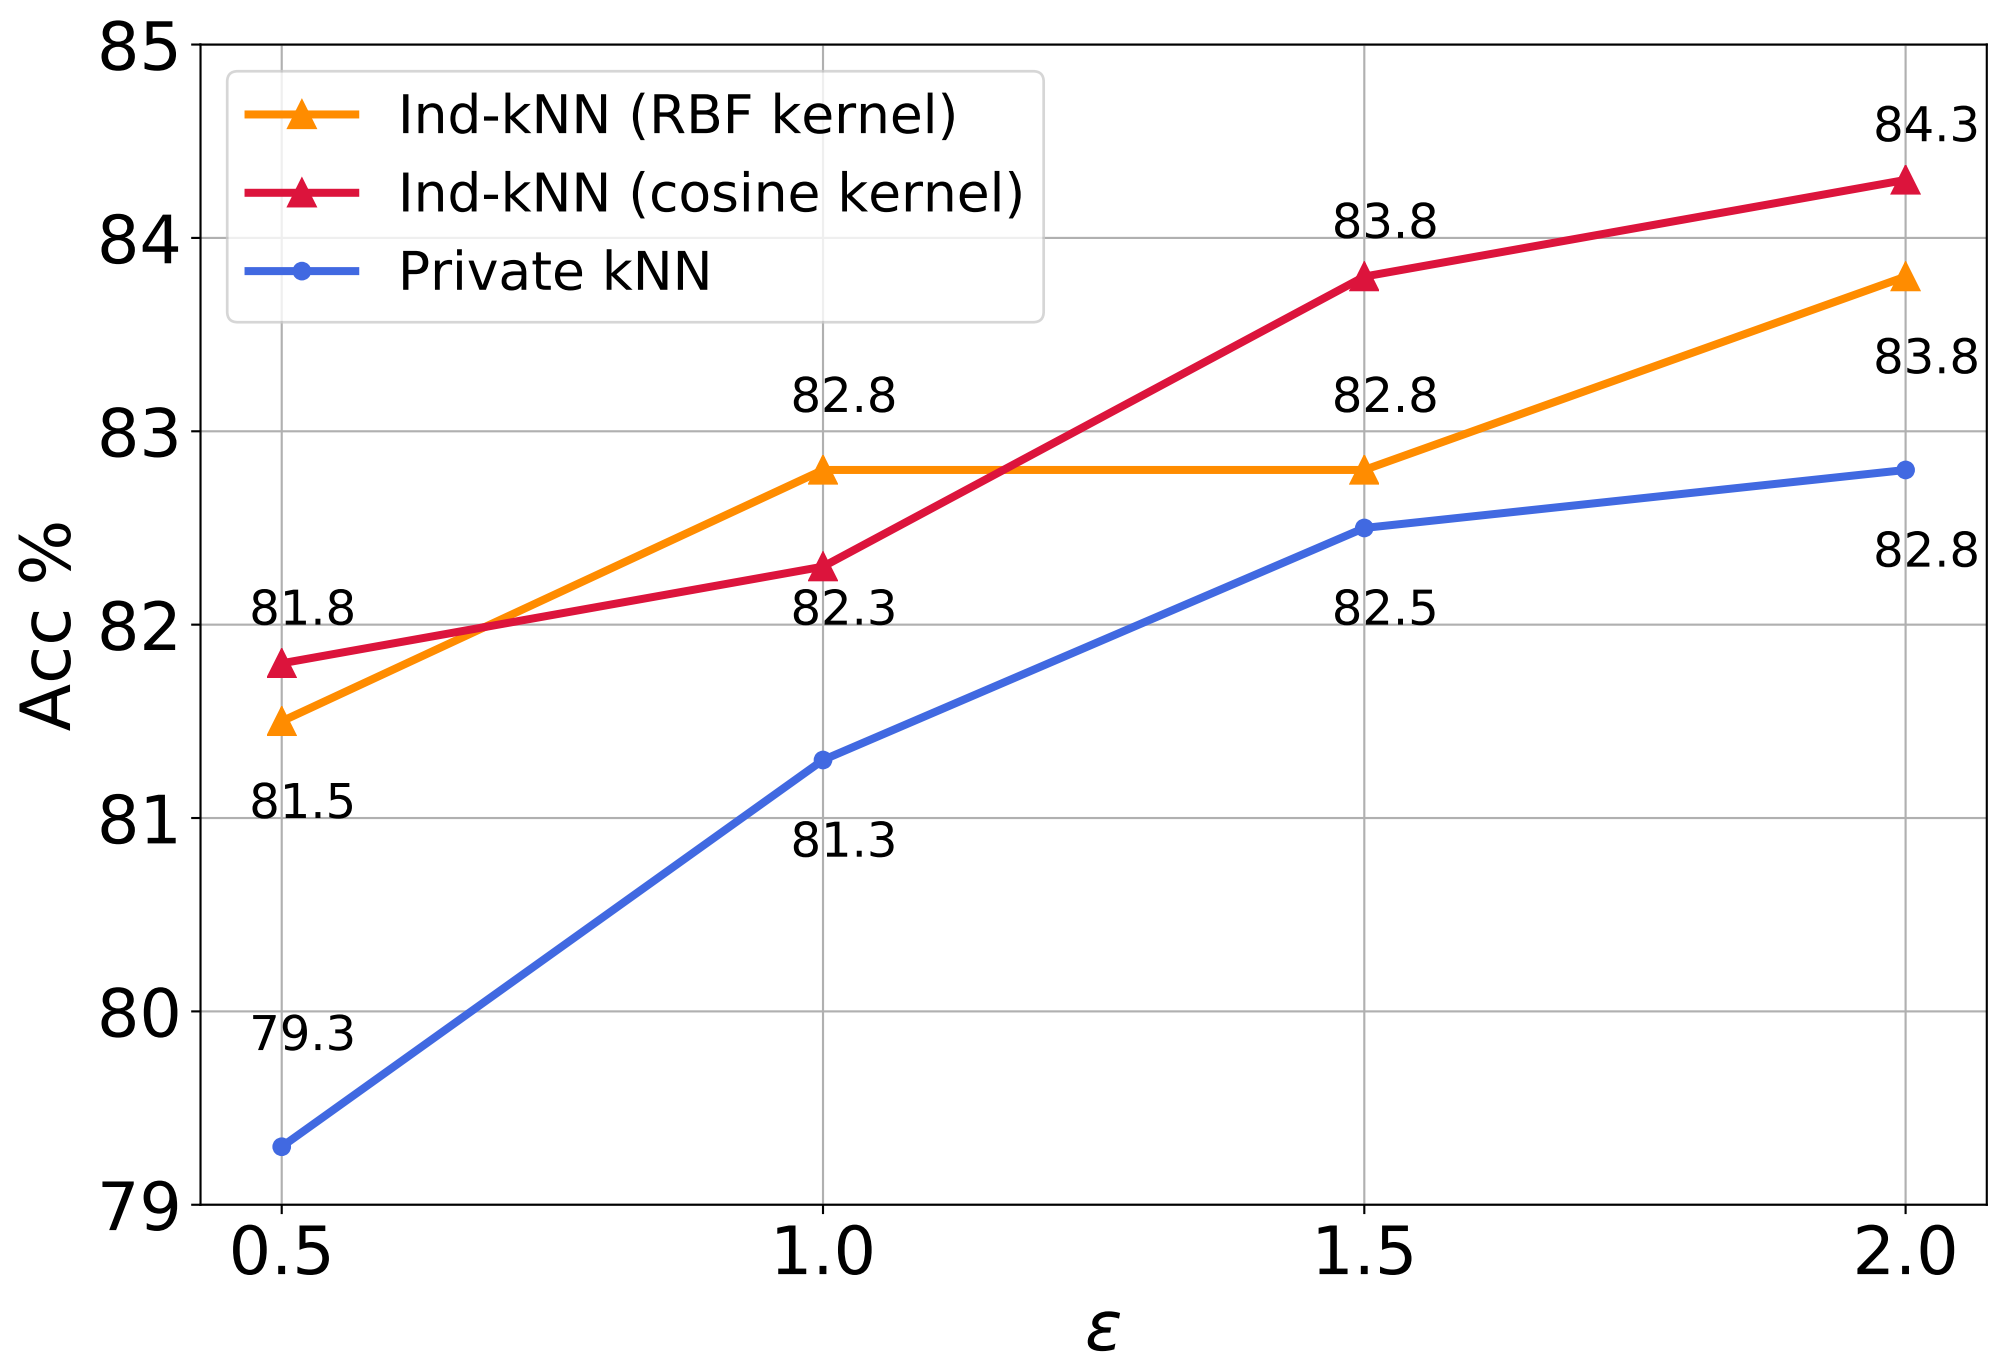

Supplement: supplementary_material [file attachment]

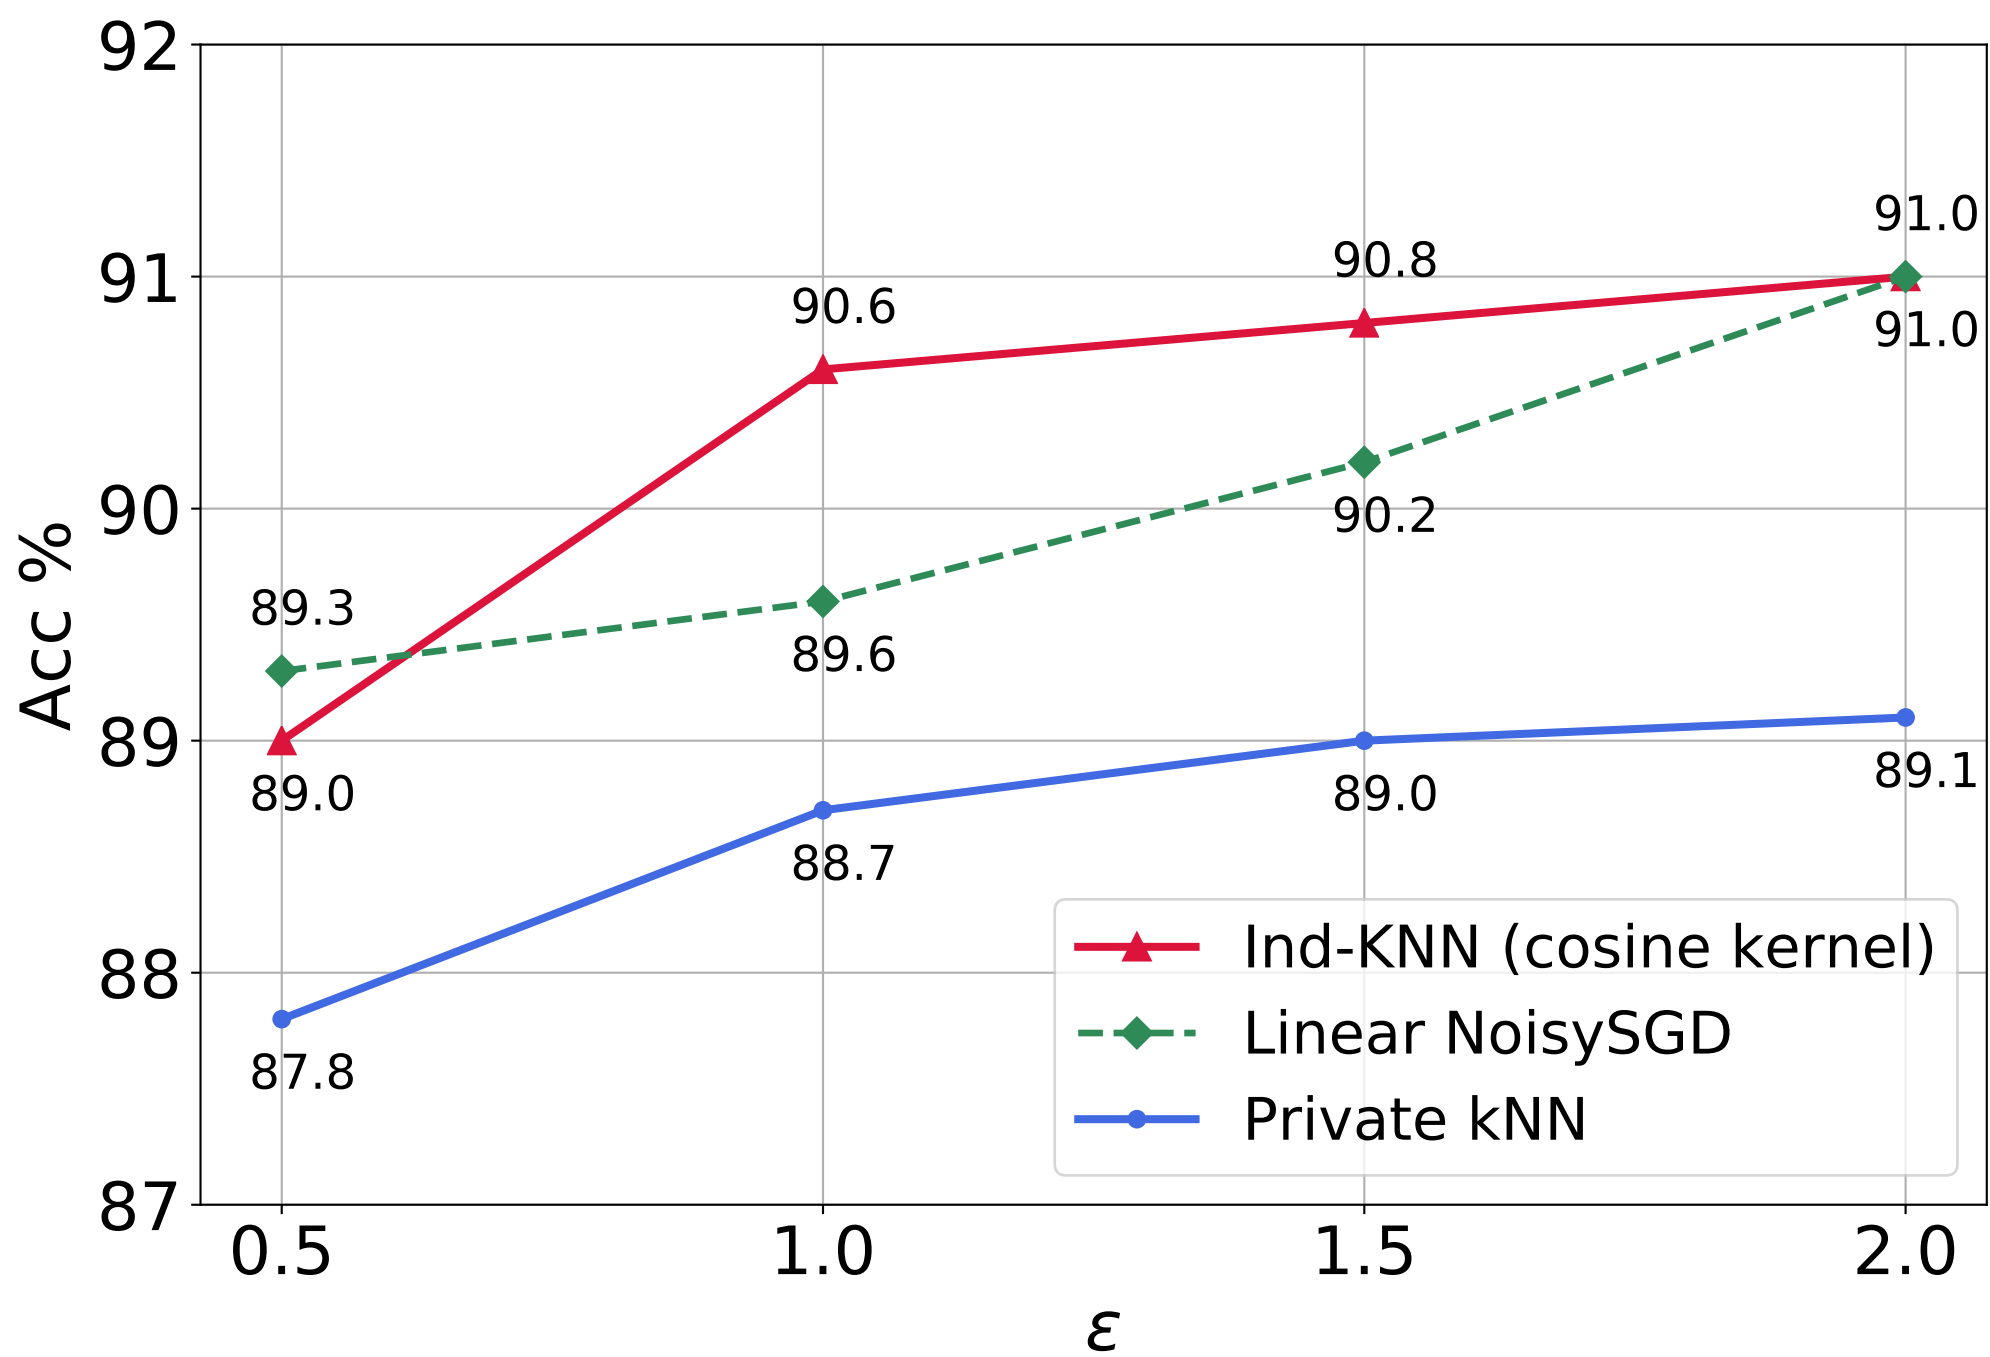

Supplement: supplementary_material [file attachment]

AG News

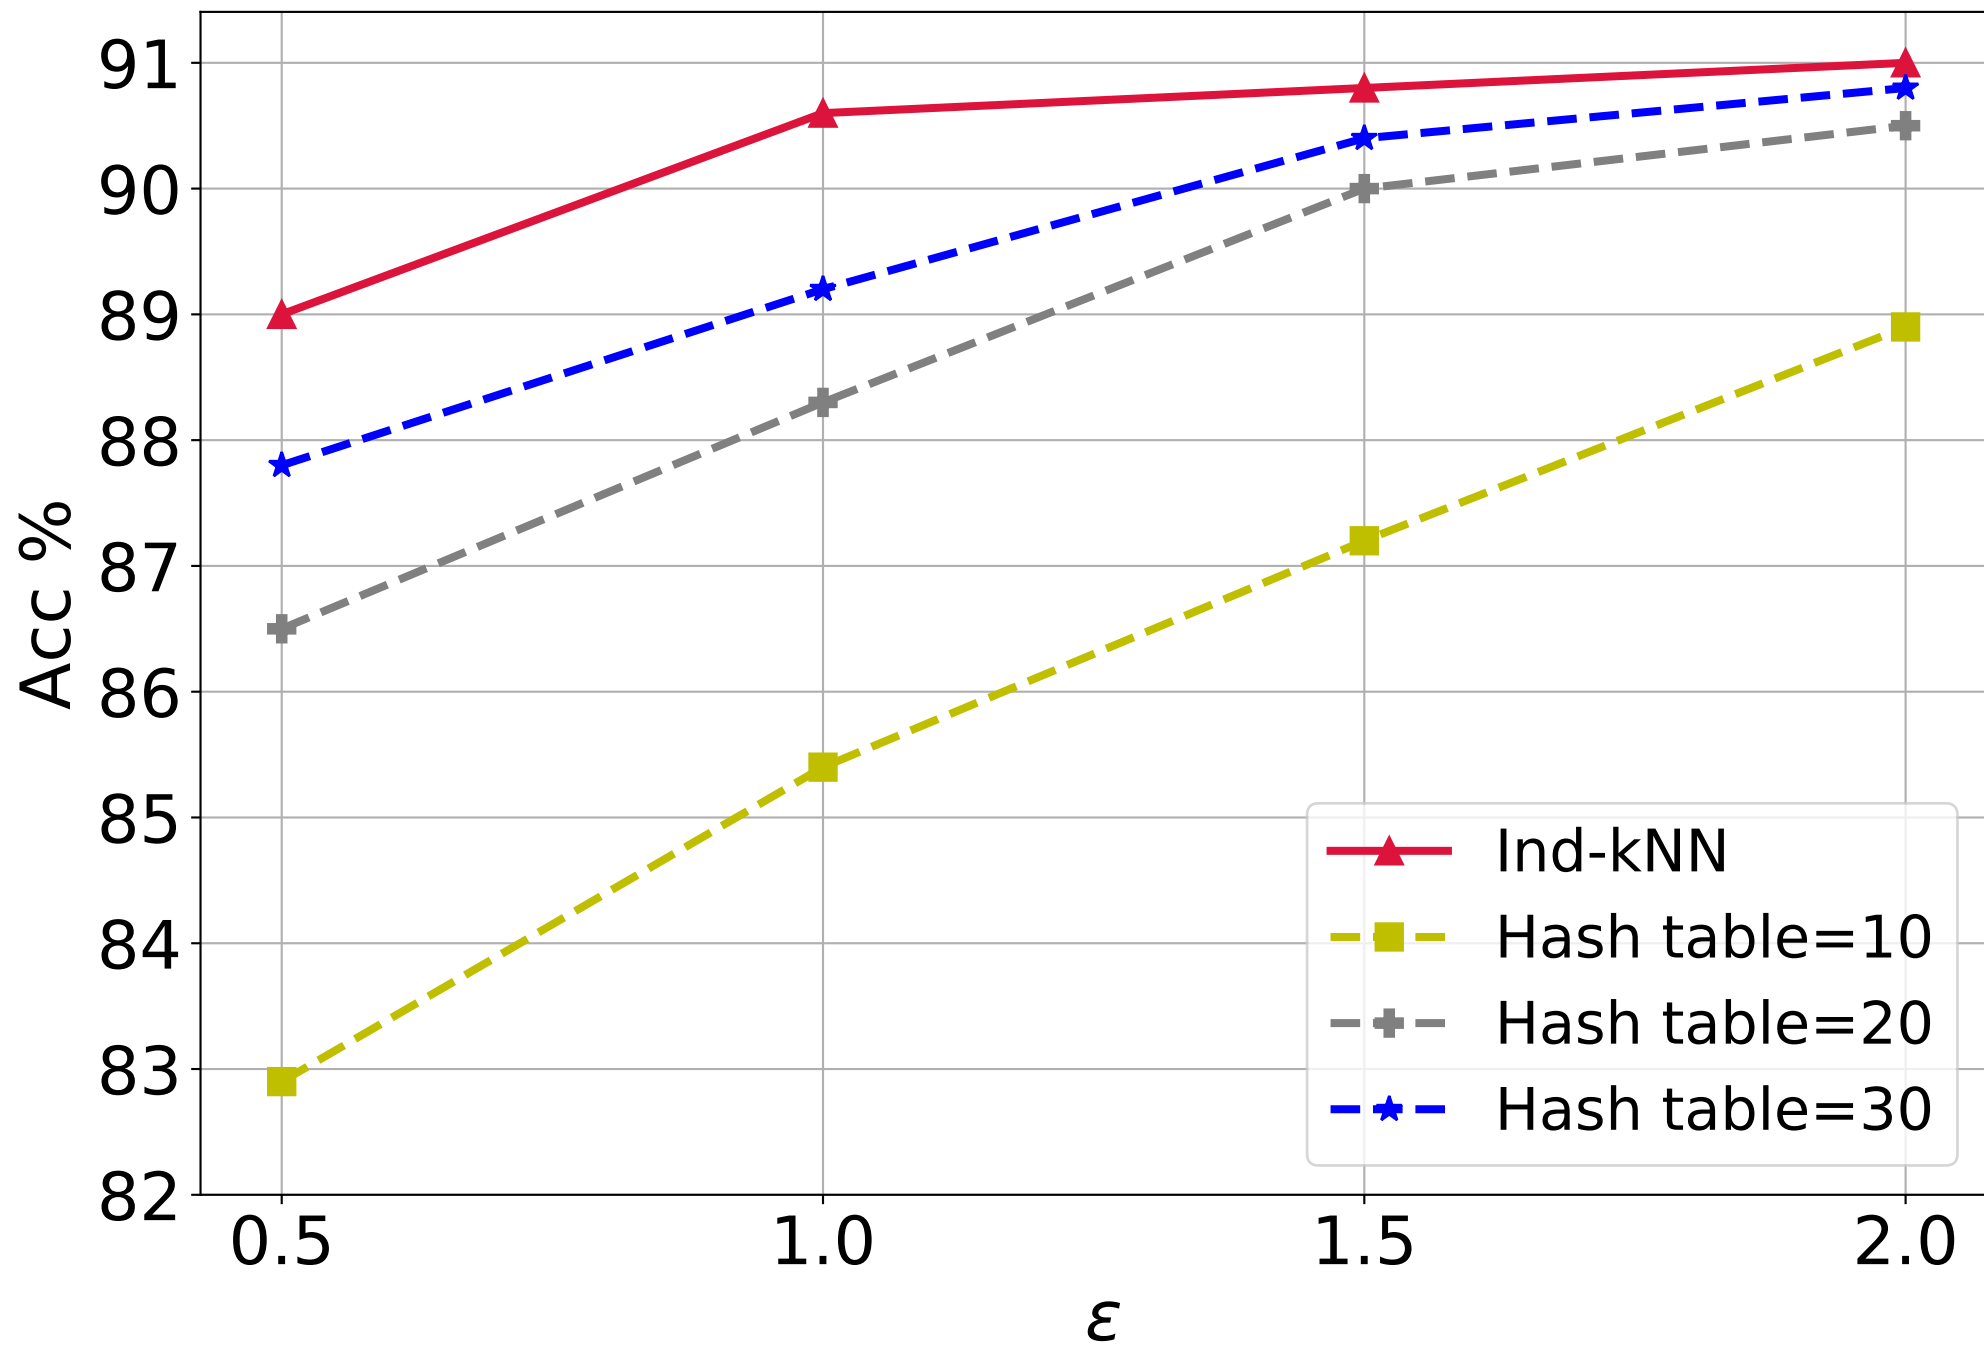

Supplement: supplementary_material [file attachment]

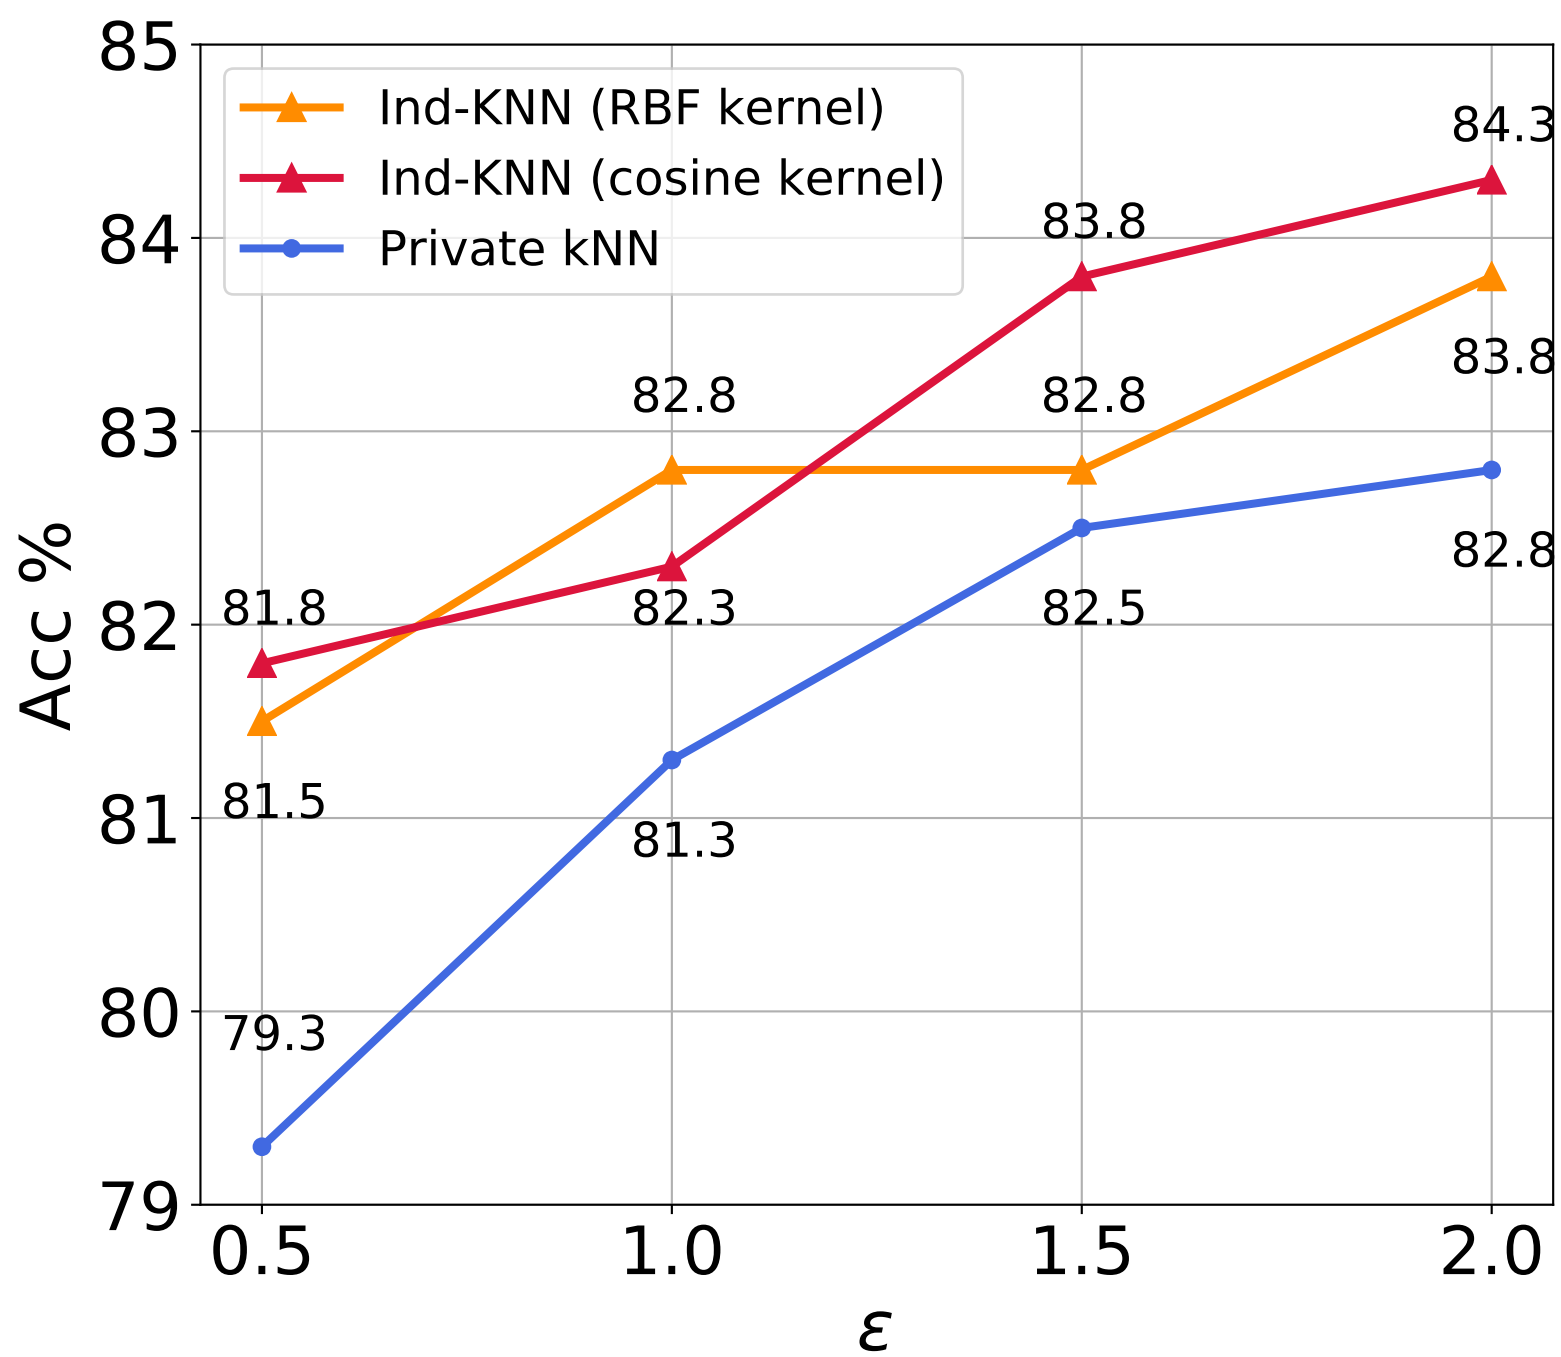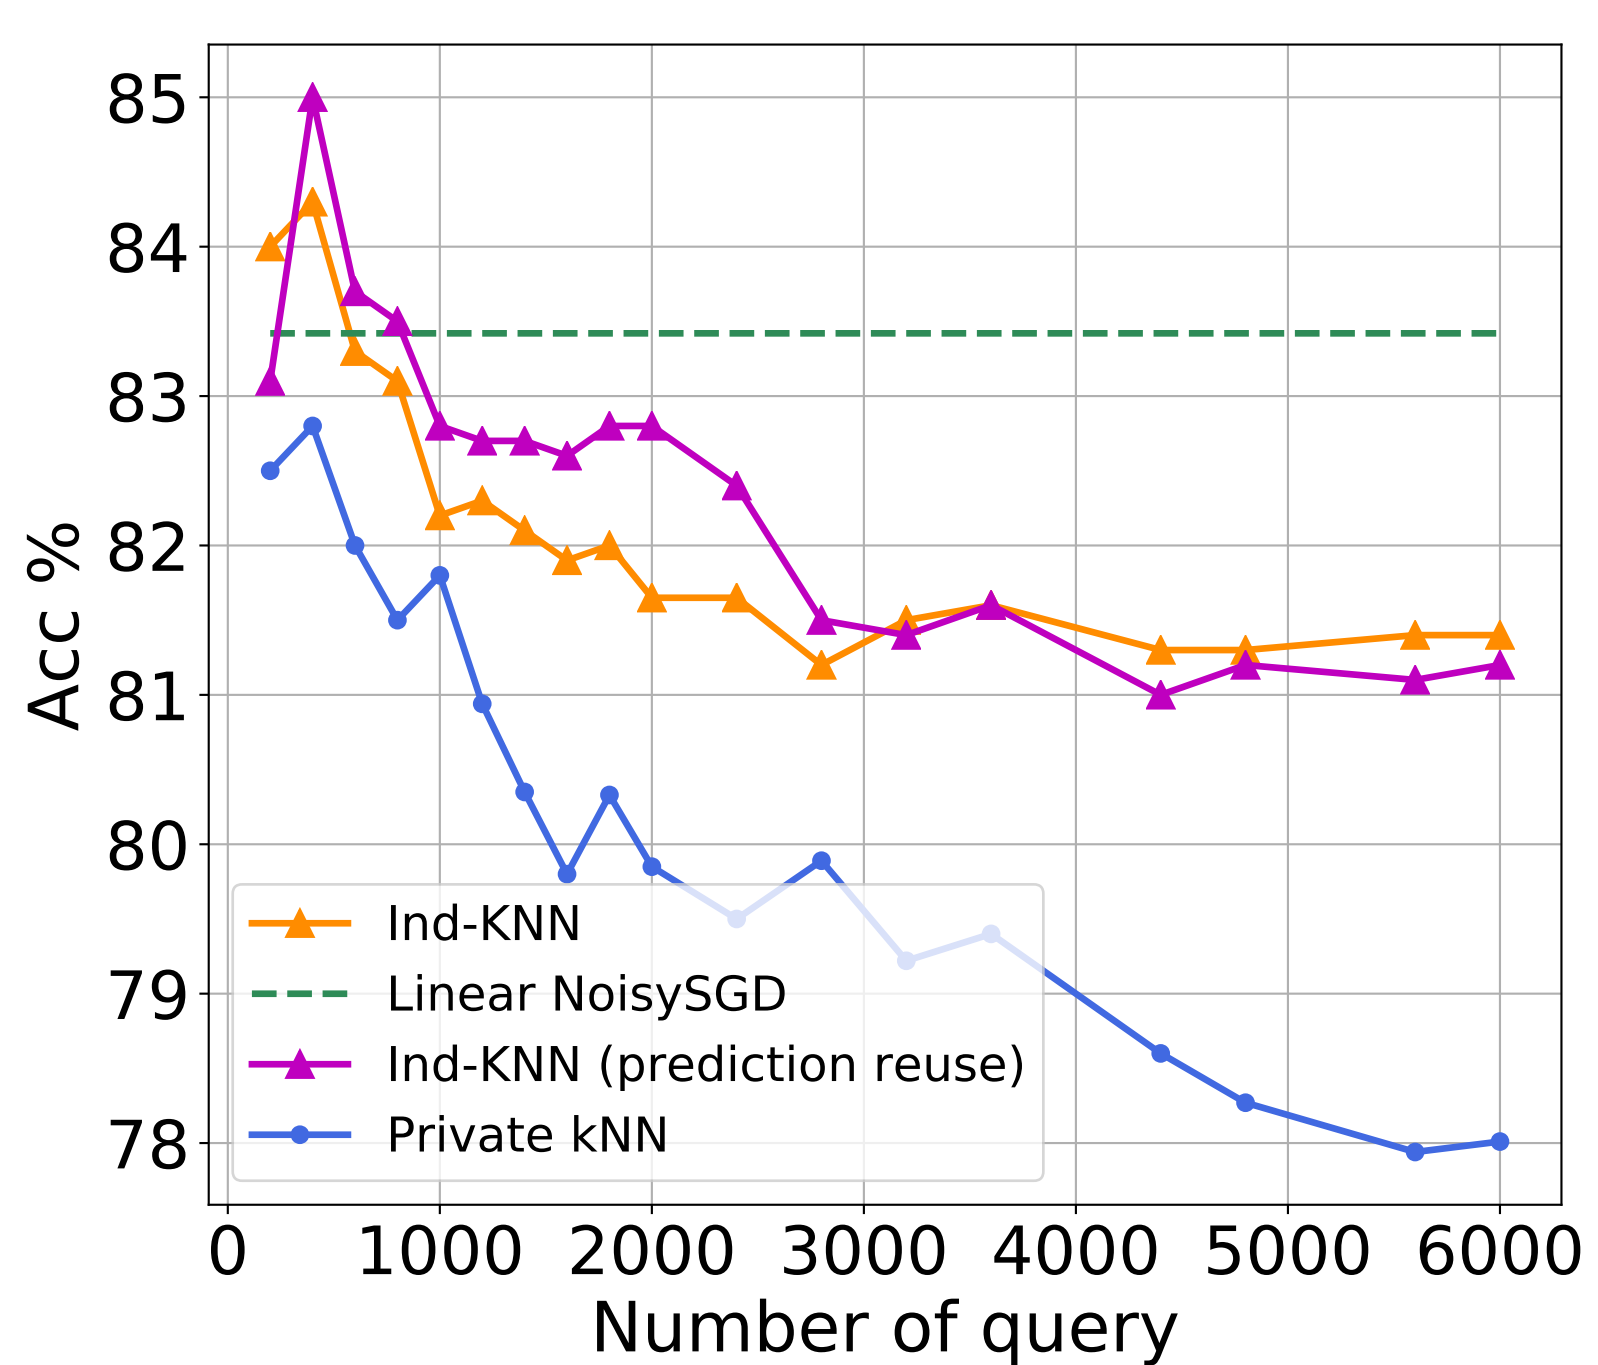

Supplement: supplementary_material [file attachment]

Average query time

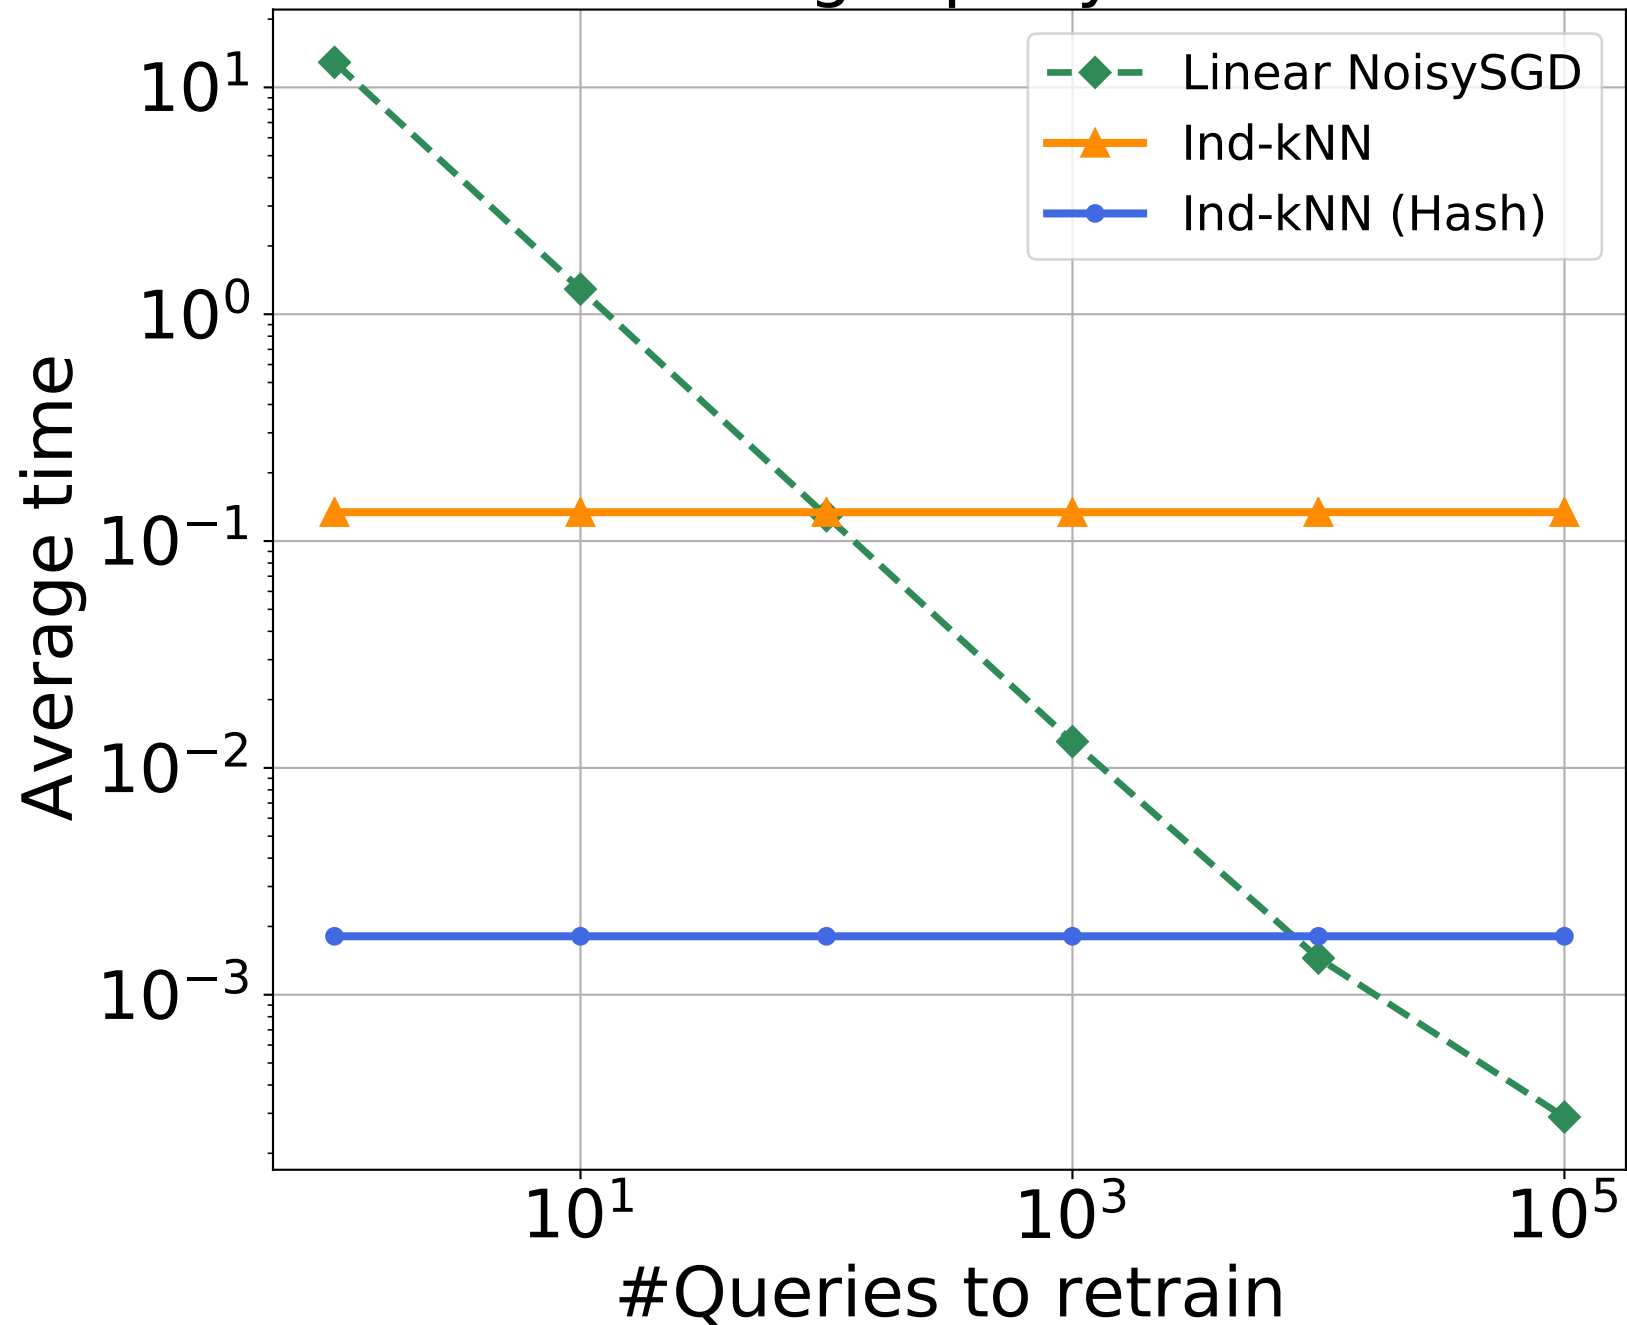

Accumulated privacy cost vs |queries|

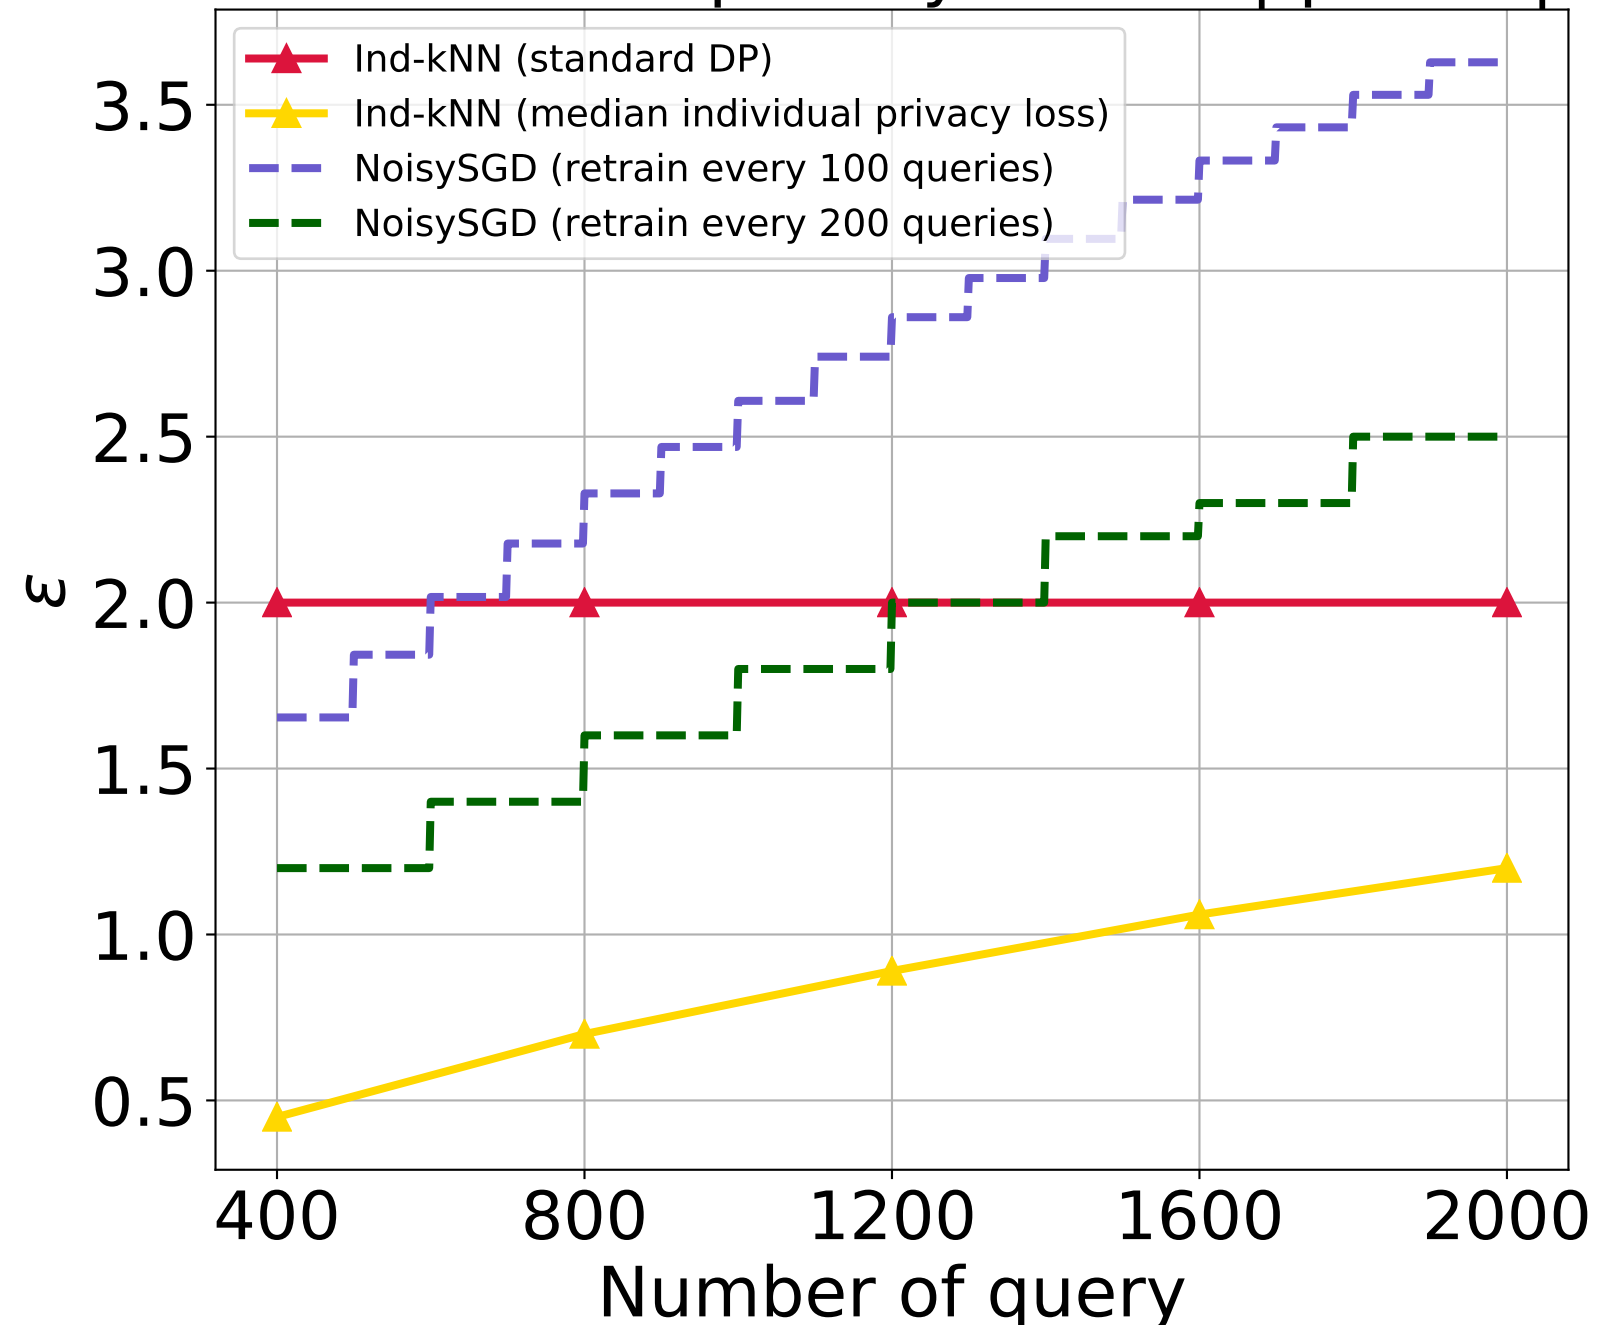

Supplement: supplementary_material [file attachment]

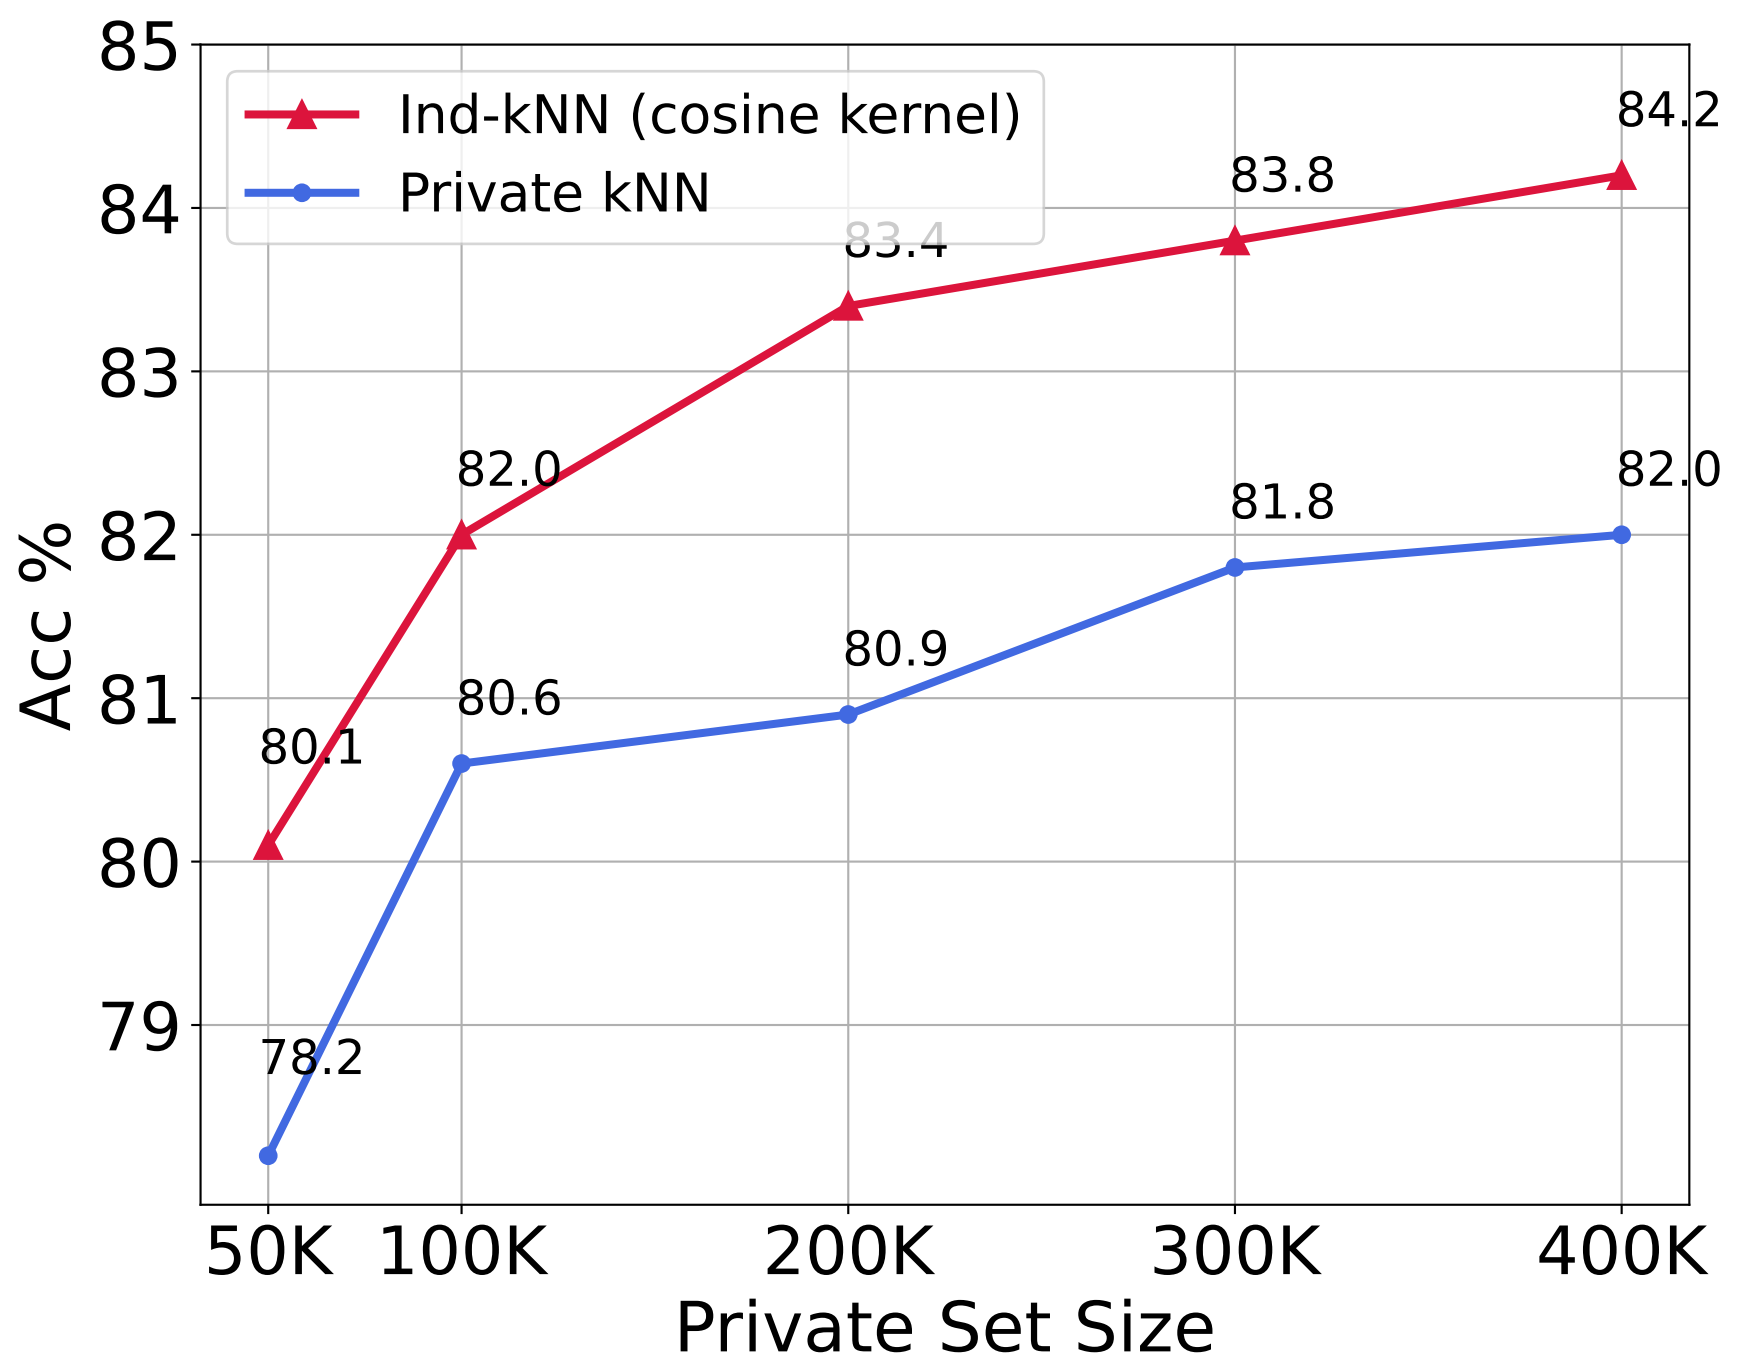

Supplement: supplementary_material [file attachment]

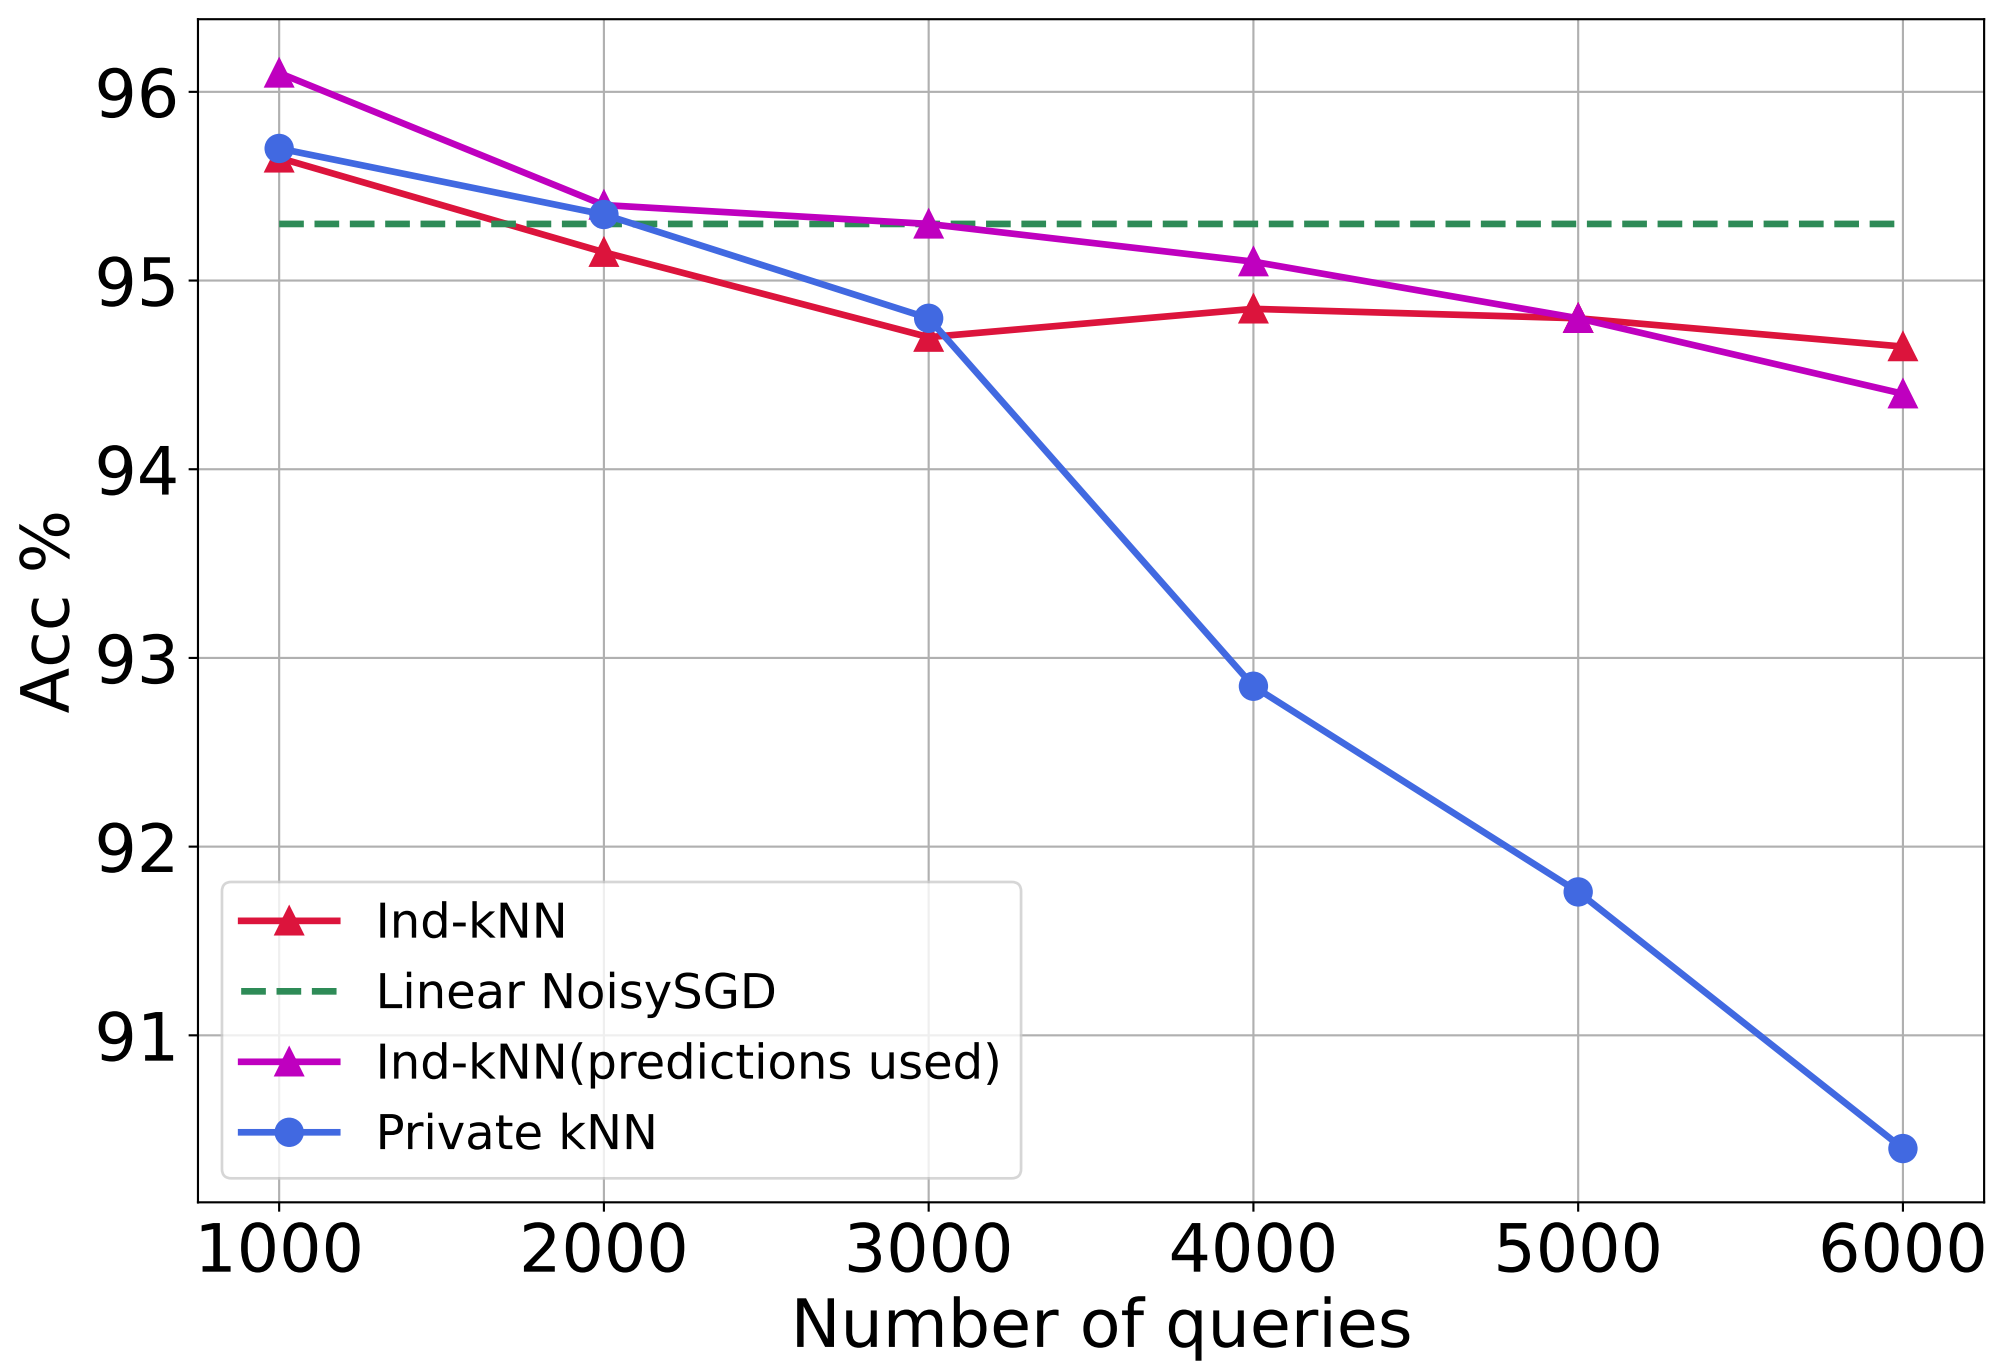

Supplement: supplementary_material [file attachment]

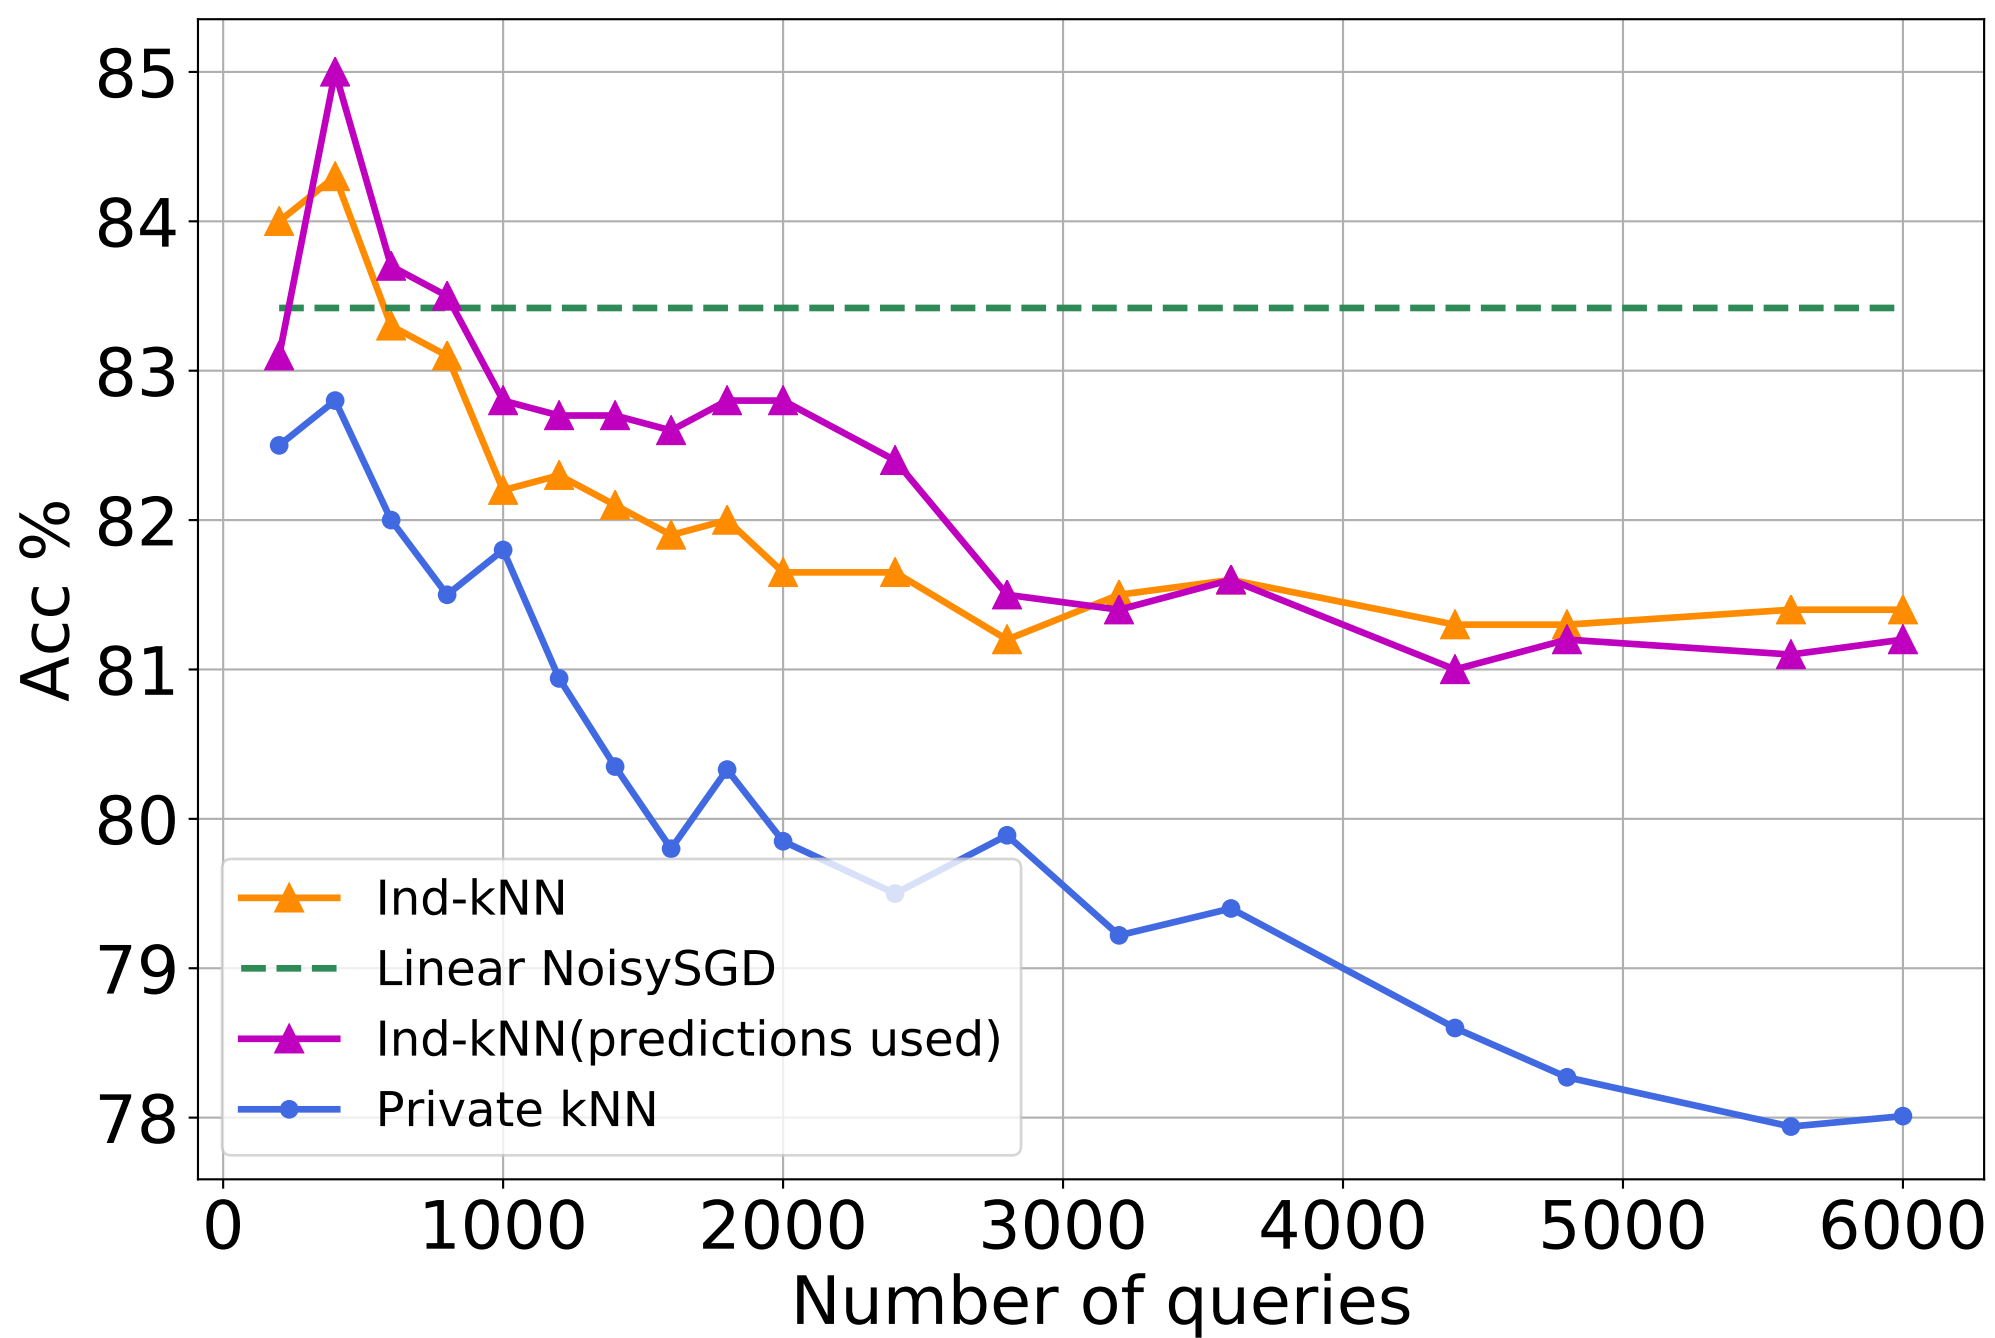

Supplement: supplementary_material [file attachment]

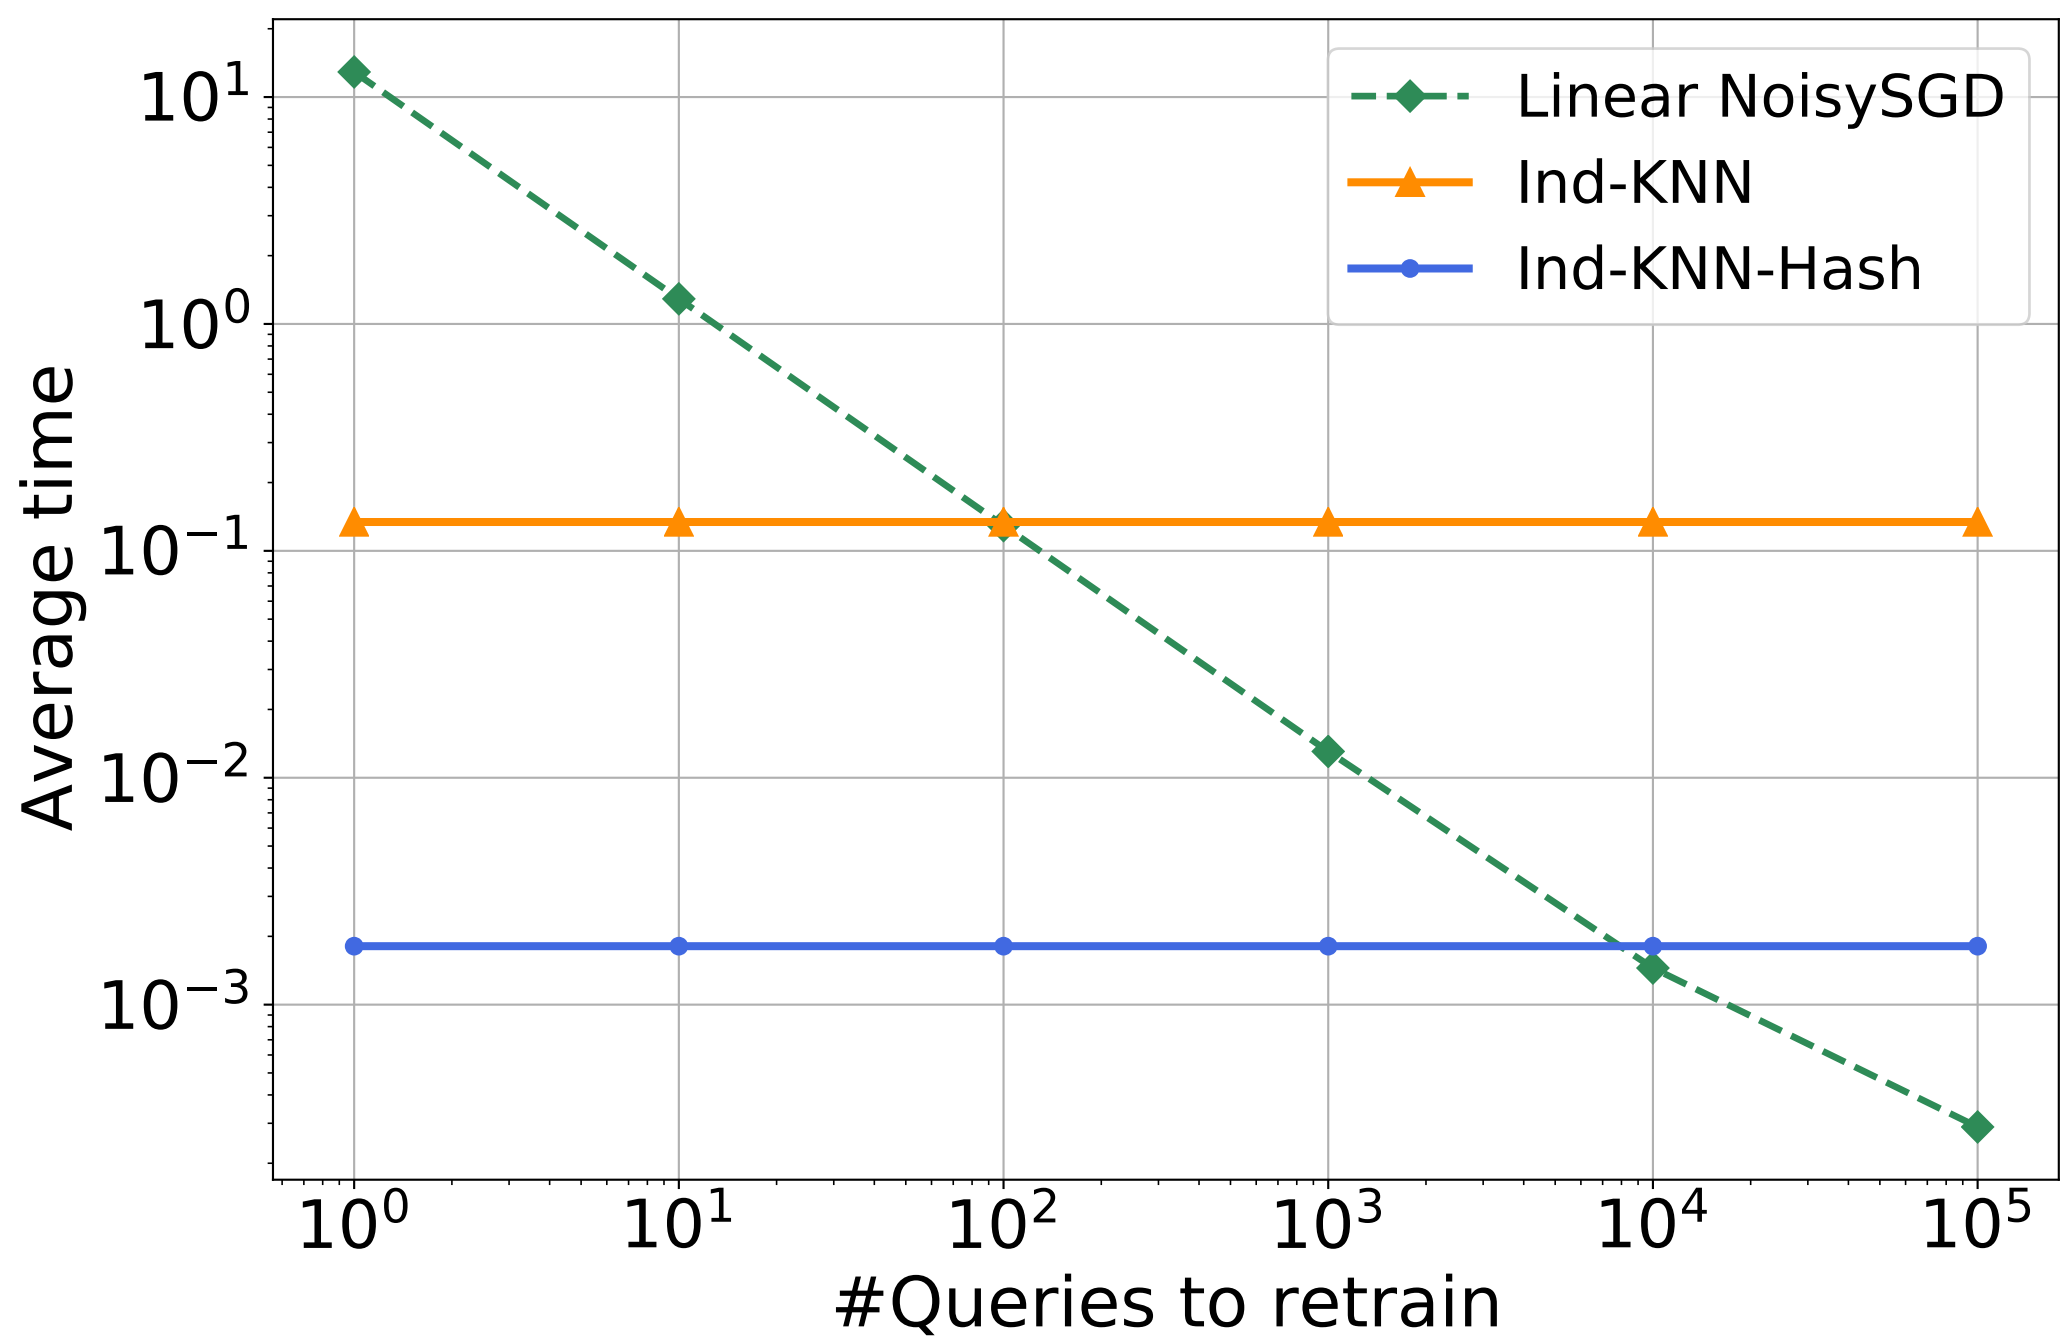

Supplement: supplementary_material [file attachment]

CIFAR-10

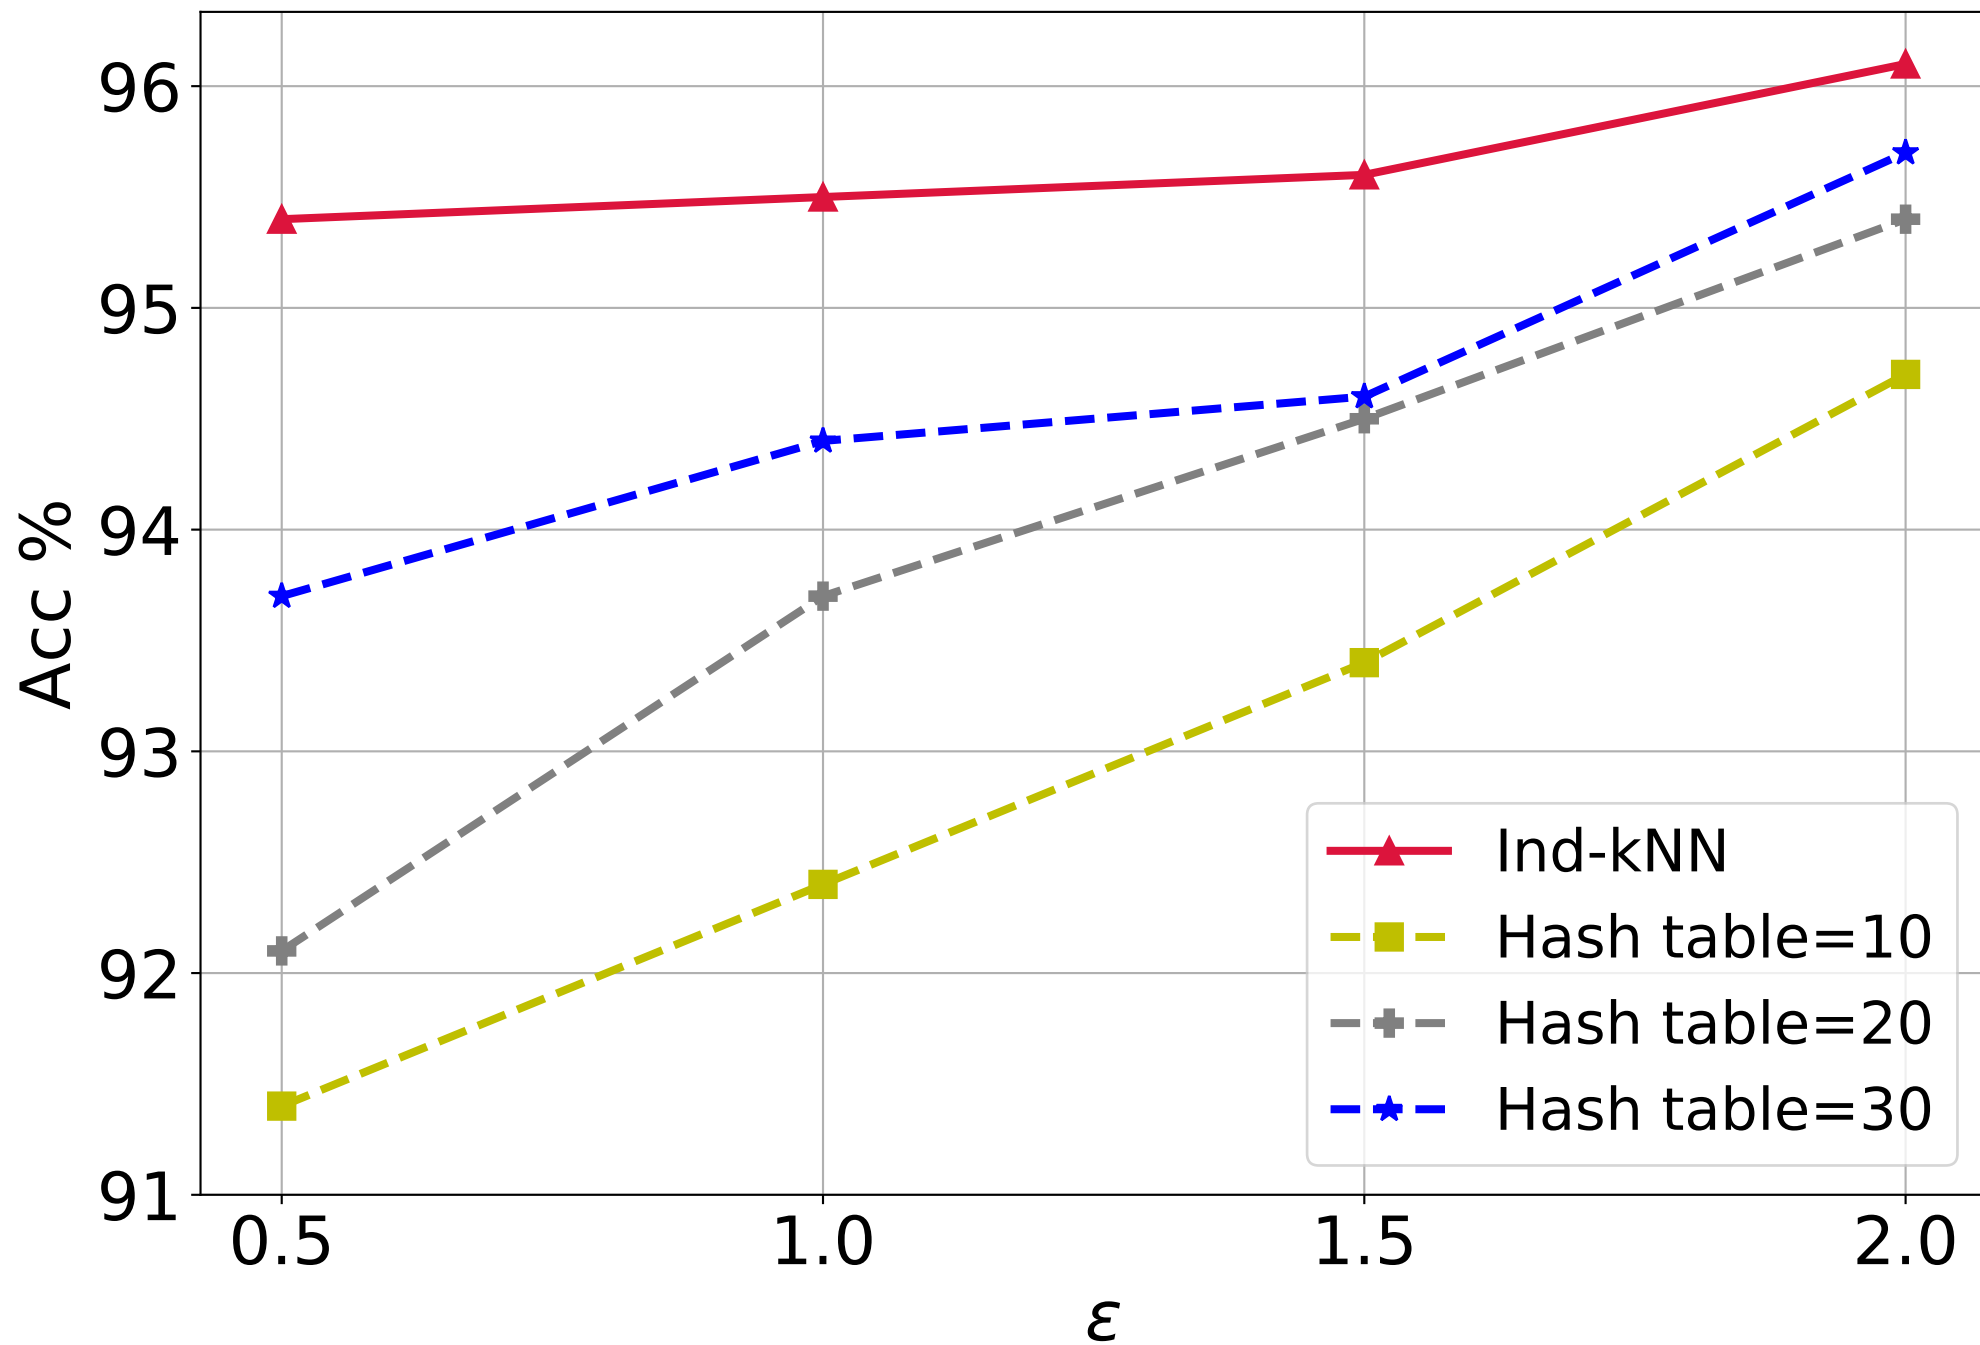

Supplement: supplementary_material [file attachment]

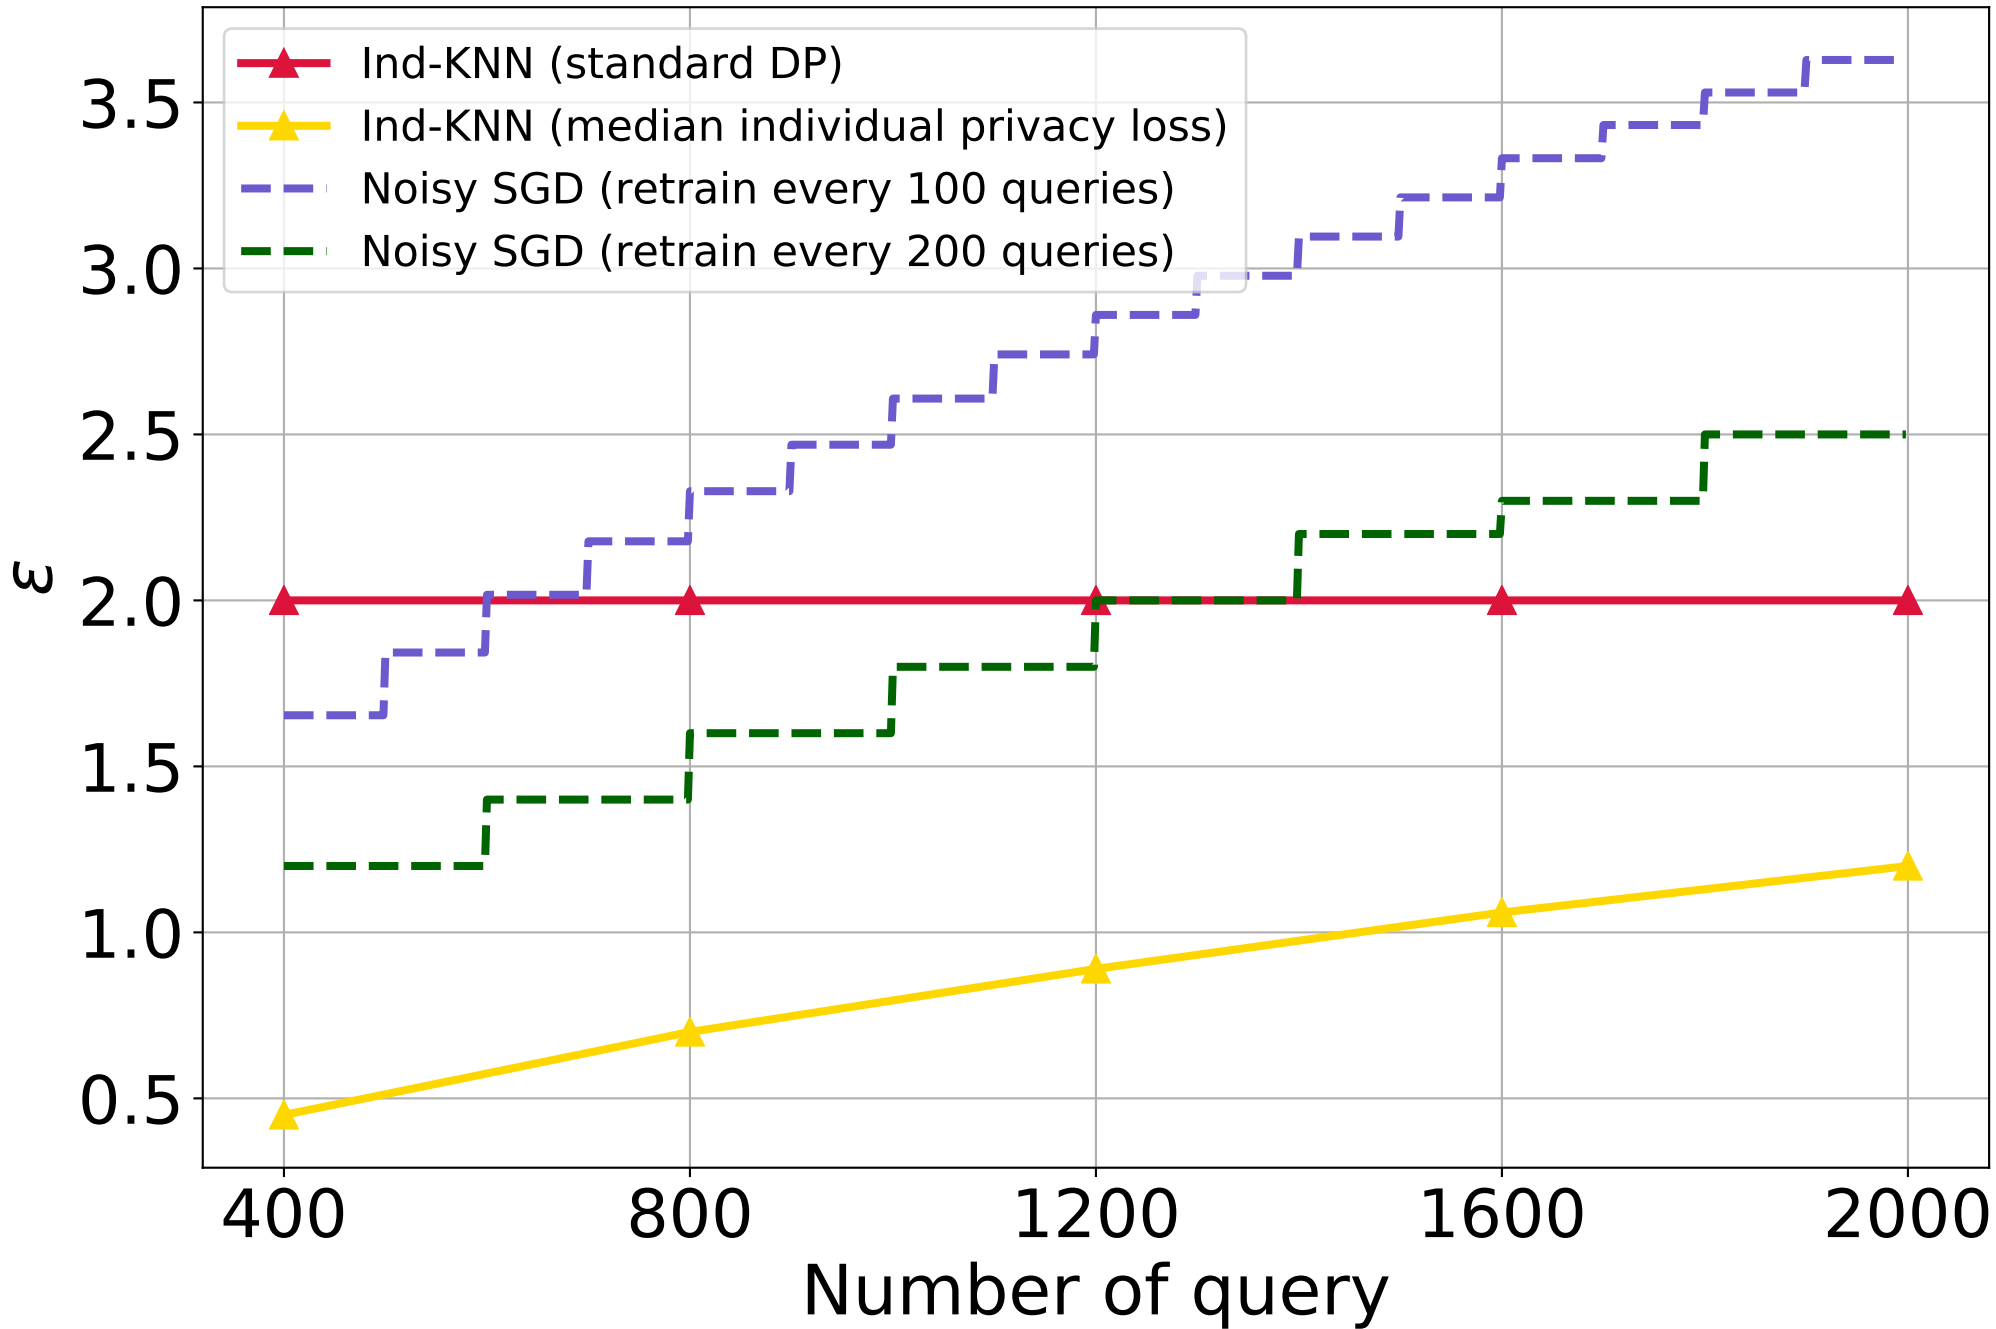

Supplement: supplementary_material [file attachment]

Computational cost

$10^{-1}$

$10^{-2}$

$10^4$

$10^3$

$10^2$

Retrain request every receive Q queries

15

10

5

Privacy loss  $\epsilon$

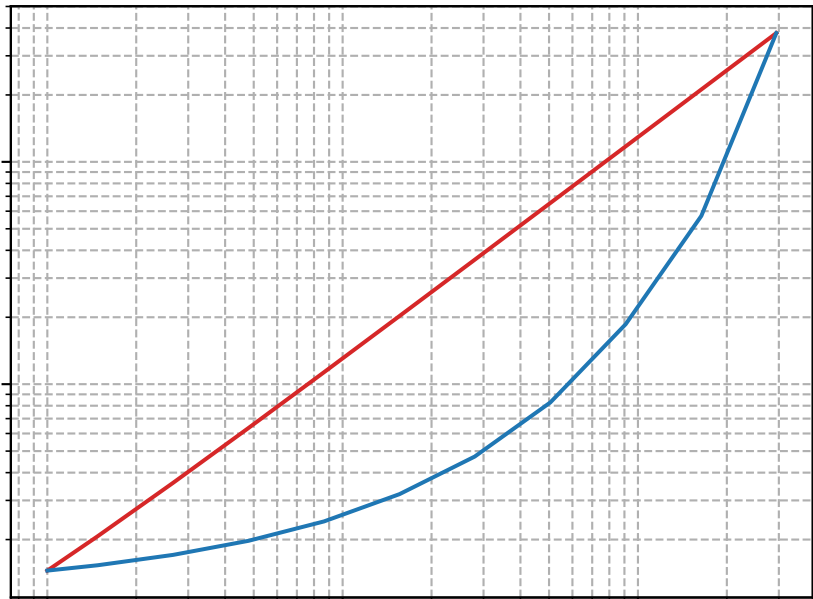

Supplement: supplementary_material [file attachment]

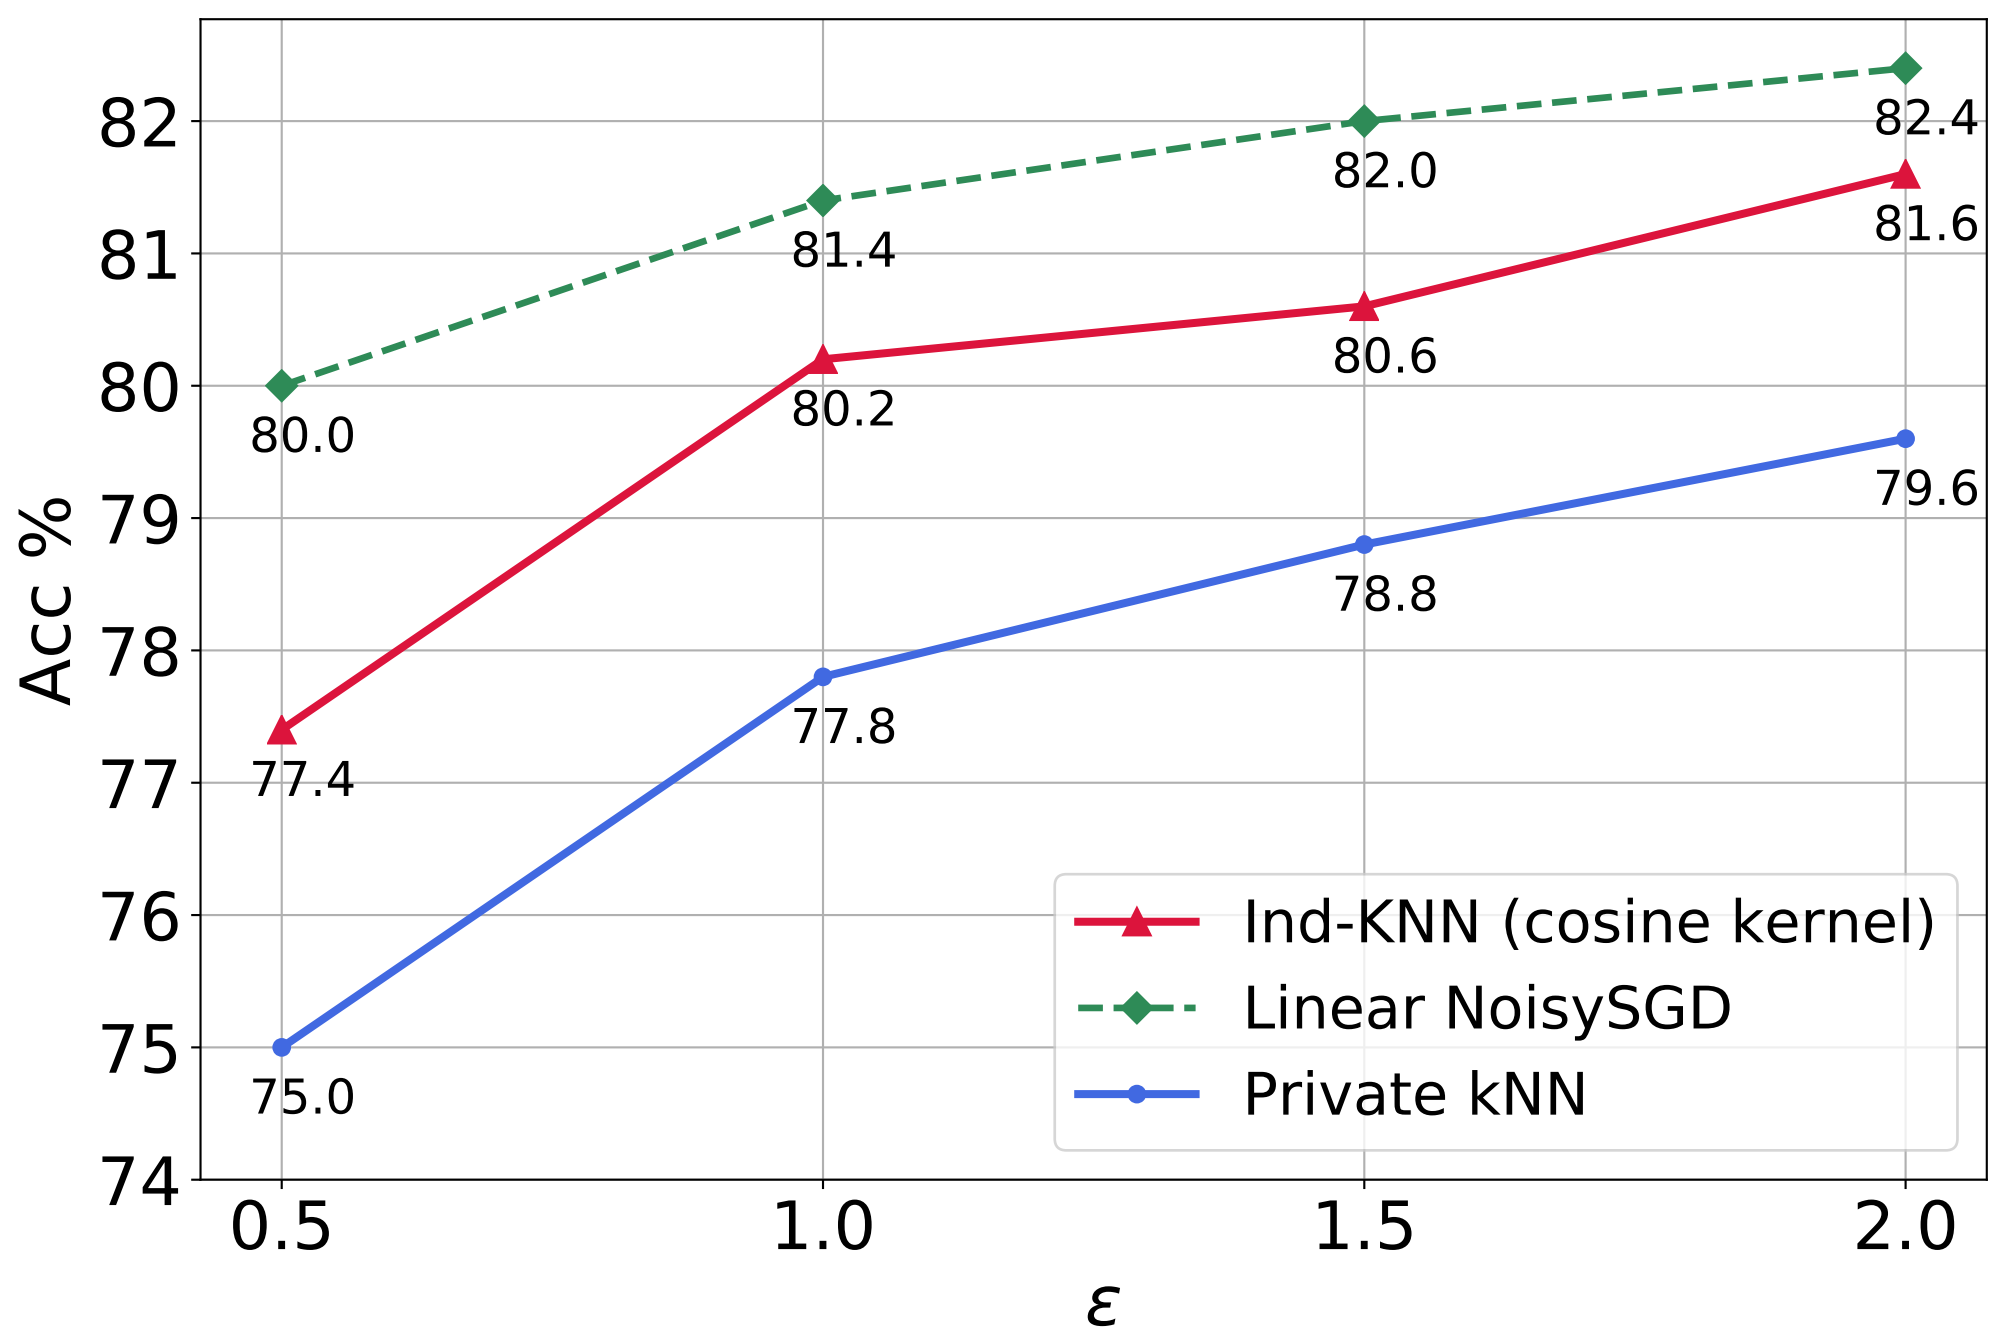

Supplement: supplementary_material [file attachment]

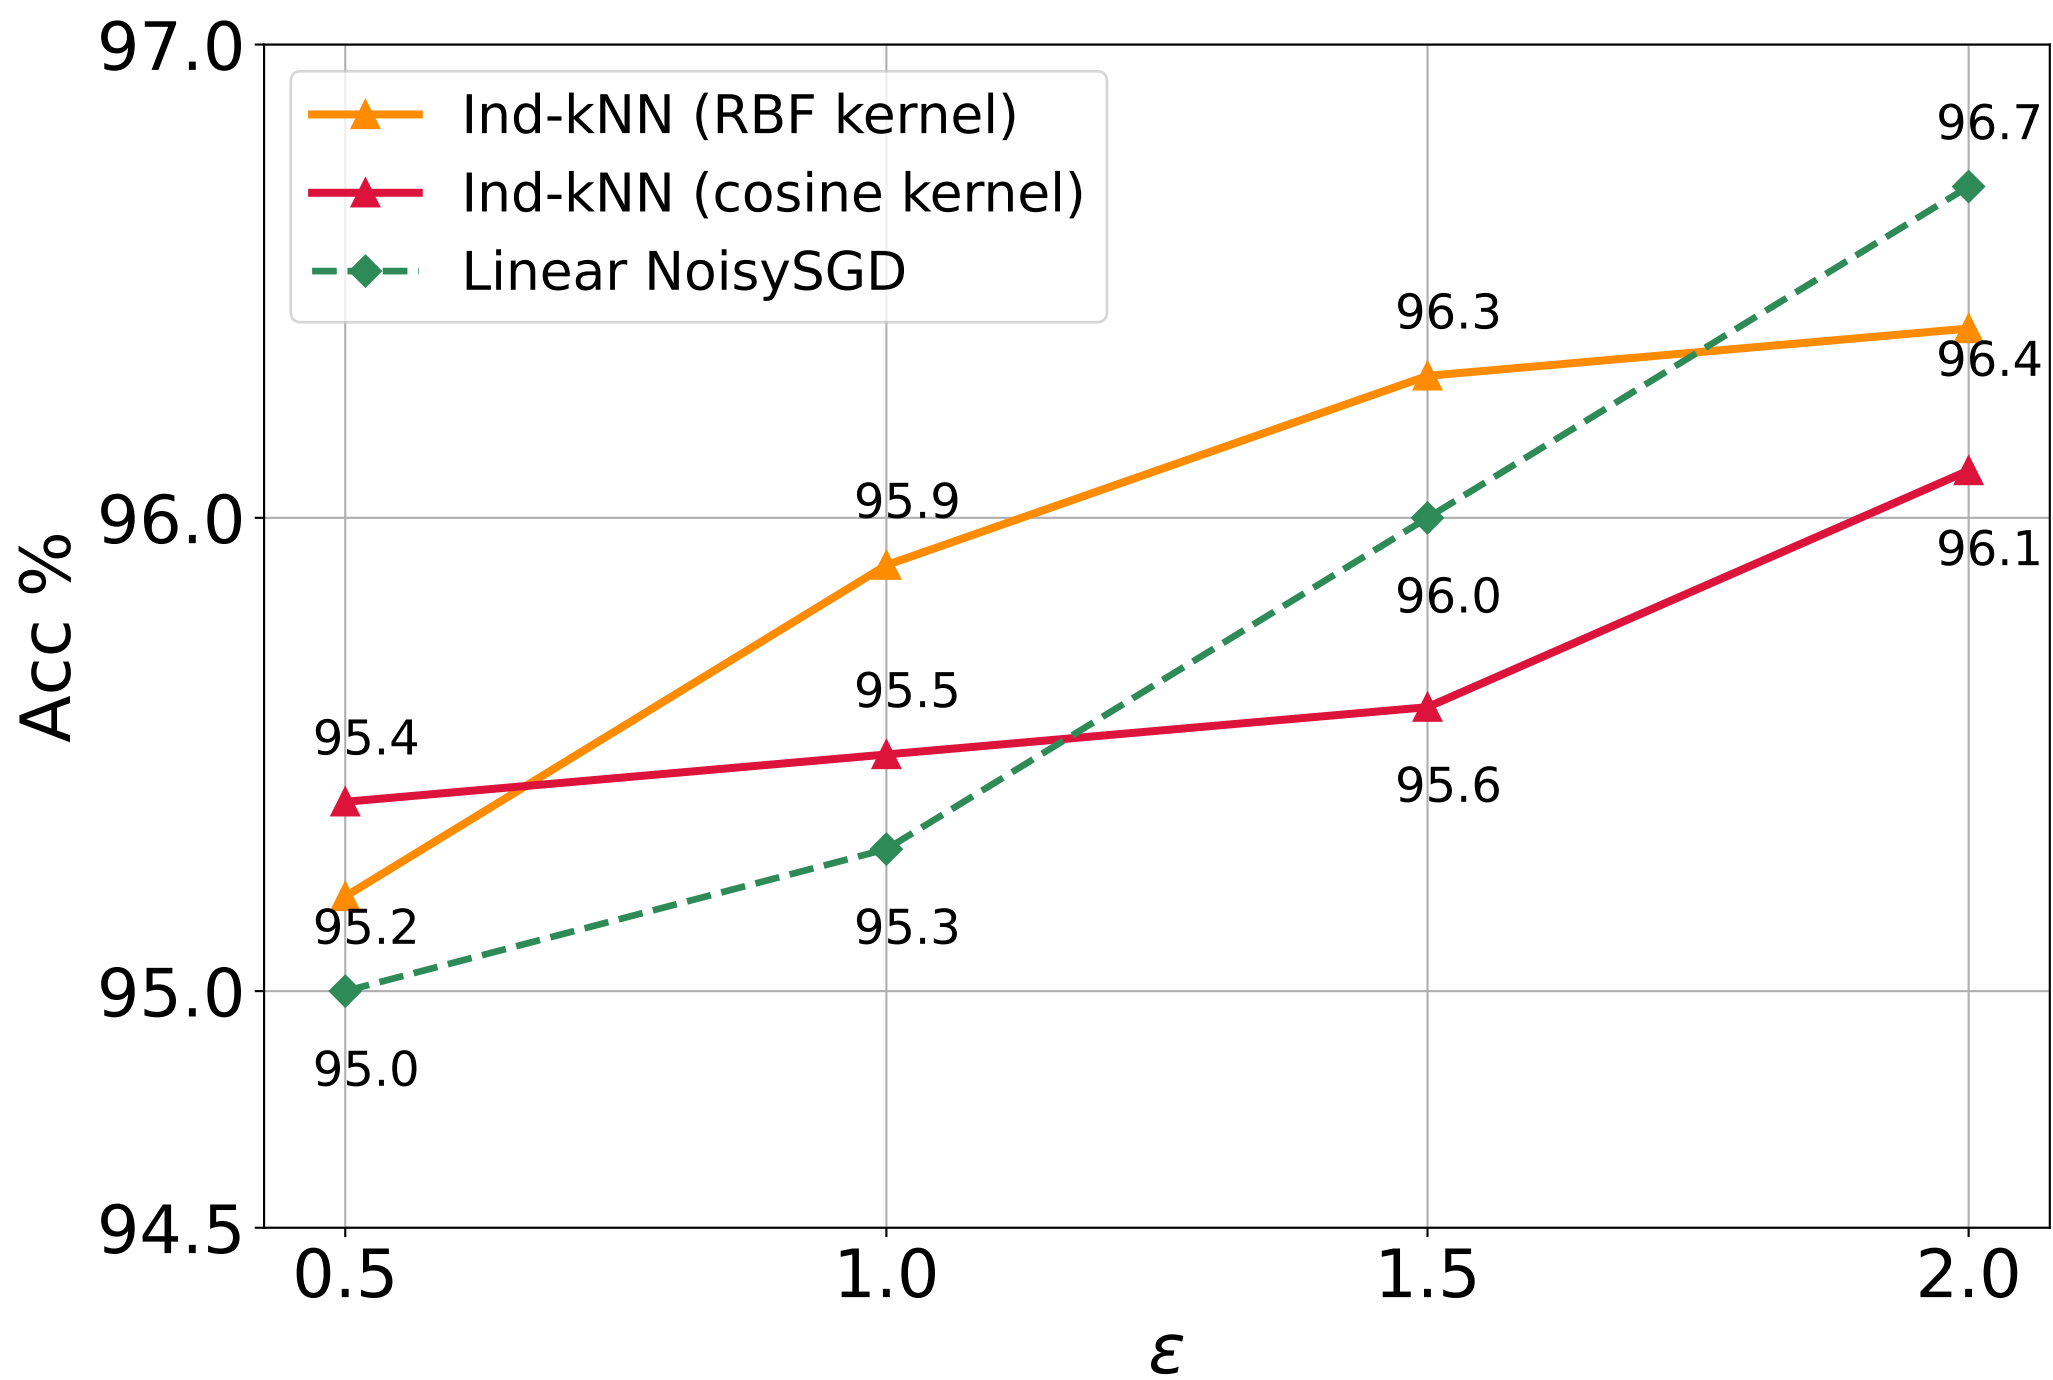

Supplement: supplementary_material [file attachment]

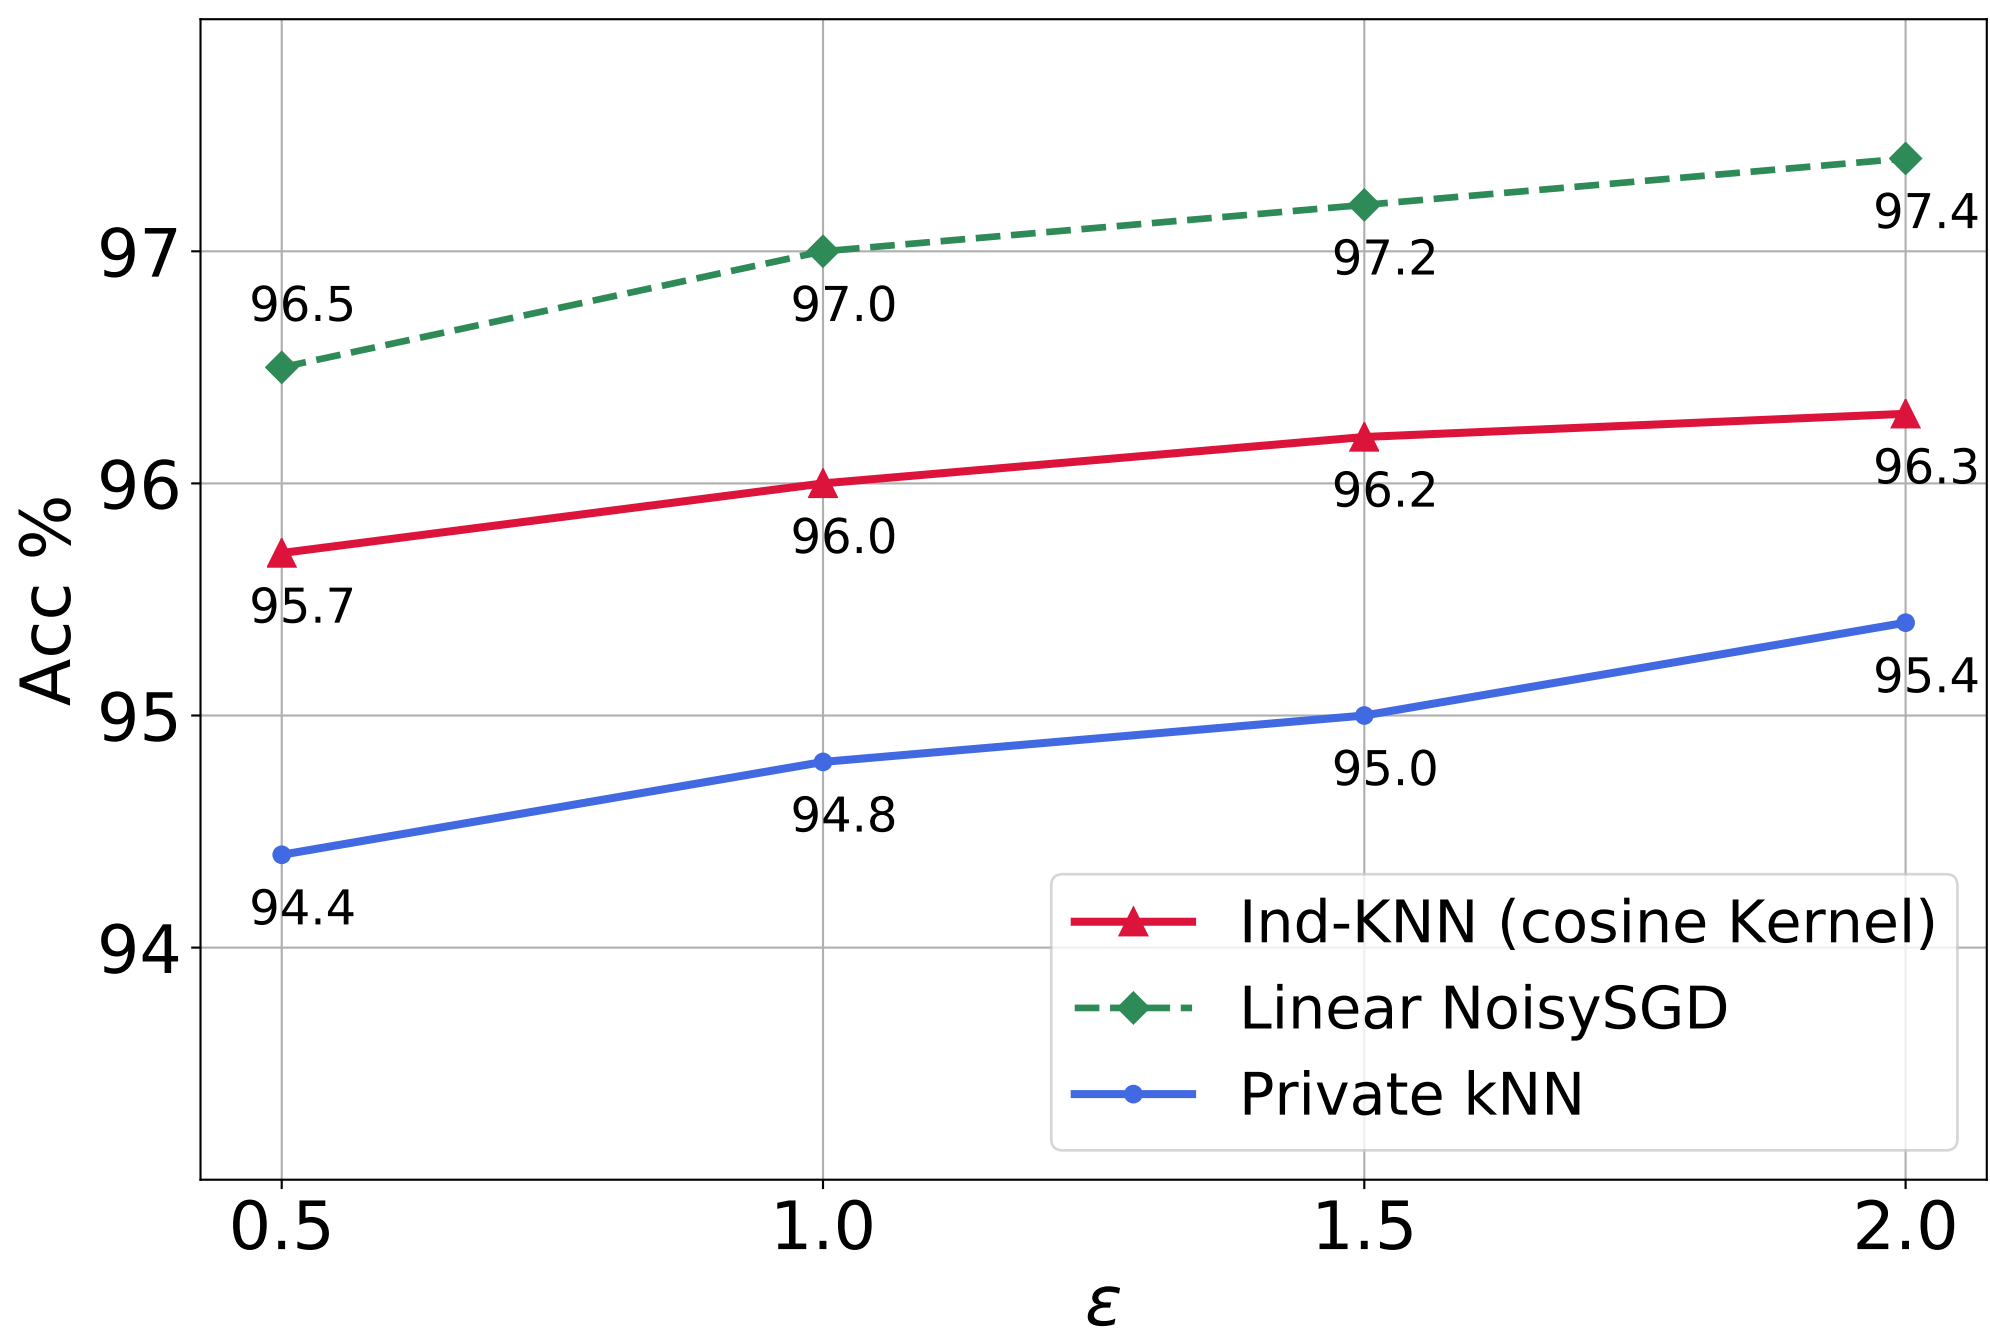

Supplement: supplementary_material [file attachment]

Average query time



Accumulated privacy cost vs |queries|

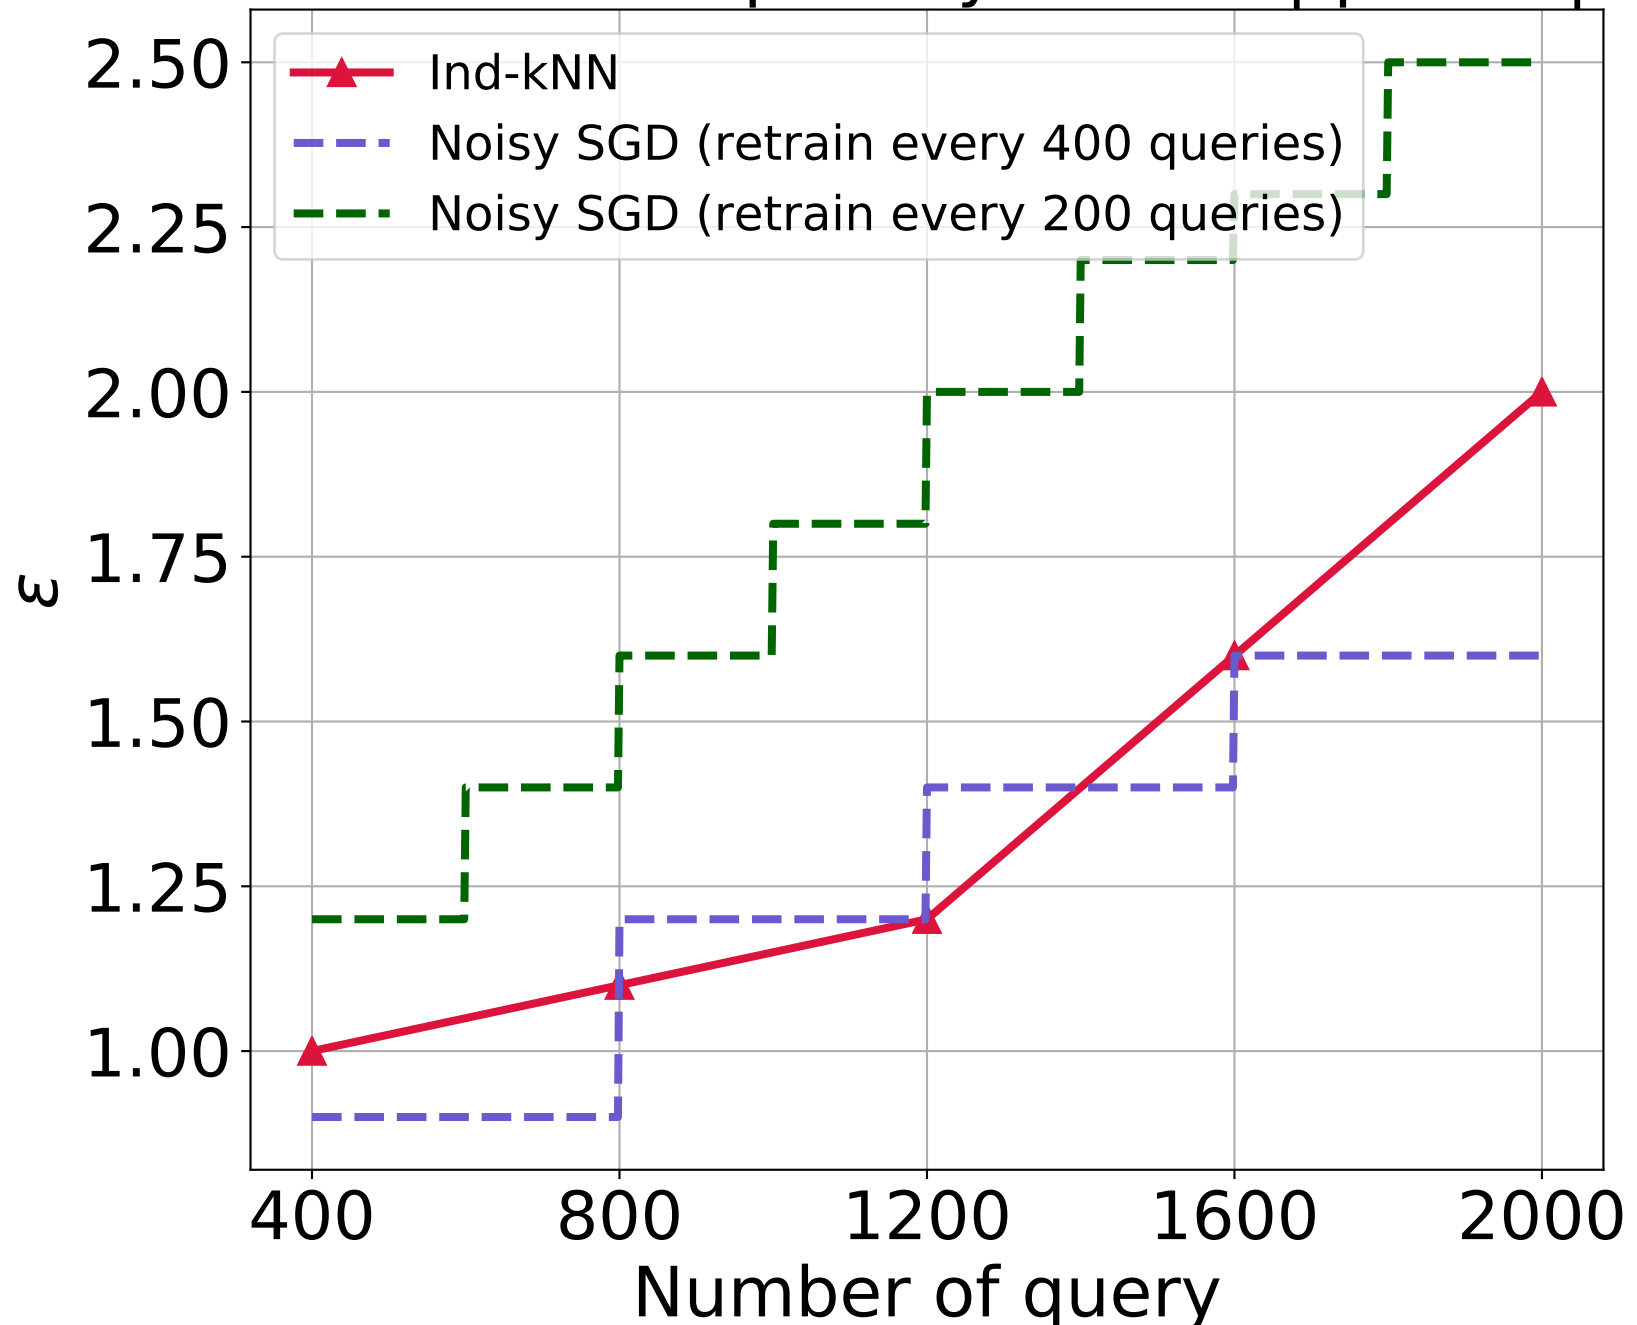

Supplement: supplementary_material [file attachment]
